# Supplementary material for: Single-Tear Proteomics: A Feasible Approach to Precision Medicine
Source: MDPI journal article supplement (doi:10.3390/ijms221910750), 2021-10-04
Supplement: s1 [file s1]

| Subject ID | Gender | Age |
|------------|--------|-----|
| Subject 01 | Male   | 26  |
| Subject 02 | Male   | 25  |
| Subject 03 | Female | 23  |
| Subject 04 | Male   | 26  |
| Subject 05 | Male   | 23  |
| Subject 06 | Male   | 21  |
| Subject 07 | Female | 21  |
| Subject 08 | Female | 19  |
| Subject 09 | Female | 19  |
| Subject 10 | Female | 29  |
| Subject 11 | Male   | 25  |
| Subject 12 | Male   | 29  |
| Subject 13 | Female | 21  |
| Subject 14 | Male   | 25  |
| Subject 15 | Male   | 23  |
| Subject 16 | Female | 25  |
| Subject 17 | Male   | 25  |
| Subject 18 | Male   | 25  |
| Subject 19 | Female | 23  |

|               |        |    |
|---------------|--------|----|
| Subject<br>20 | Male   | 23 |
| Subject<br>21 | Female | 24 |
| Subject<br>22 | Female | 24 |
| Subject<br>23 | Female | 22 |

**Supporting information S1.** Subject IDs, gender, and age. Subjects 09 and Subject 13, highlighted in red, performed the sample collection in the morning (9-10 AM) and in the afternoon (5-6 PM) on the same day, once a week for three consecutive weeks.

**Supporting information S2.** List of keratins and keratin-associated proteins, identified over 70 runs.

| Accession  | Description                                                                           | calc. pI | MW [kDa] |
|------------|---------------------------------------------------------------------------------------|----------|----------|
| P04264     | Keratin, type II cytoskeletal 1 OS=Homo sapiens OX=9606 GN=KRT1 PE=1 SV=6             | 8.12     | 66       |
| P13645     | Keratin, type I cytoskeletal 10 OS=Homo sapiens OX=9606 GN=KRT10 PE=1 SV=6            | 5.21     | 58.8     |
| P35527     | Keratin, type I cytoskeletal 9 OS=Homo sapiens OX=9606 GN=KRT9 PE=1 SV=3              | 5.24     | 62       |
| P35908     | Keratin, type II cytoskeletal 2 epidermal OS=Homo sapiens OX=9606 GN=KRT2 PE=1 SV=2   | 8        | 65.4     |
| P13647     | Keratin, type II cytoskeletal 5 OS=Homo sapiens OX=9606 GN=KRT5 PE=1 SV=3             | 7.74     | 62.3     |
| P02538     | Keratin, type II cytoskeletal 6A OS=Homo sapiens OX=9606 GN=KRT6A PE=1 SV=3           | 8        | 60       |
| P04259     | Keratin, type II cytoskeletal 6B OS=Homo sapiens OX=9606 GN=KRT6B PE=1 SV=5           | 8        | 60       |
| P02533     | Keratin, type I cytoskeletal 14 OS=Homo sapiens OX=9606 GN=KRT14 PE=1 SV=4            | 5.16     | 51.5     |
| P08779     | Keratin, type I cytoskeletal 16 OS=Homo sapiens OX=9606 GN=KRT16 PE=1 SV=4            | 5.05     | 51.2     |
| P13646     | Keratin, type I cytoskeletal 13 OS=Homo sapiens OX=9606 GN=KRT13 PE=1 SV=4            | 4.96     | 49.6     |
| P19013     | Keratin, type II cytoskeletal 4 OS=Homo sapiens OX=9606 GN=KRT4 PE=1 SV=5             | 6.61     | 56.1     |
| O95678     | Keratin, type II cytoskeletal 75 OS=Homo sapiens OX=9606 GN=KRT75 PE=1 SV=2           | 7.74     | 59.5     |
| Q01546     | Keratin, type II cytoskeletal 2 oral OS=Homo sapiens OX=9606 GN=KRT76 PE=1 SV=2       | 8.12     | 65.8     |
| P12035     | Keratin, type II cytoskeletal 3 OS=Homo sapiens OX=9606 GN=KRT3 PE=1 SV=3             | 6.48     | 64.4     |
| Q04695     | Keratin, type I cytoskeletal 17 OS=Homo sapiens OX=9606 GN=KRT17 PE=1 SV=2            | 5.02     | 48.1     |
| P19012     | Keratin, type I cytoskeletal 15 OS=Homo sapiens OX=9606 GN=KRT15 PE=1 SV=3            | 4.77     | 49.2     |
| P08727     | Keratin, type I cytoskeletal 19 OS=Homo sapiens OX=9606 GN=KRT19 PE=1 SV=4            | 5.14     | 44.1     |
| Q7Z794     | Keratin, type II cytoskeletal 1b OS=Homo sapiens OX=9606 GN=KRT77 PE=1 SV=3           | 5.99     | 61.9     |
| F8W1S1     | Keratin, type II cytoskeletal 74 OS=Homo sapiens OX=9606 GN=KRT74 PE=1 SV=1           | 7.44     | 59.4     |
| P05787     | Keratin, type II cytoskeletal 8 OS=Homo sapiens OX=9606 GN=KRT8 PE=1 SV=7             | 5.59     | 53.7     |
| Q5T749     | Keratinocyte proline-rich protein OS=Homo sapiens OX=9606 GN=KPRP PE=1 SV=1           | 8.27     | 64.1     |
| O43790     | Keratin, type II cuticular Hb6 OS=Homo sapiens OX=9606 GN=KRT86 PE=1 SV=1             | 5.66     | 53.5     |
| P78386     | Keratin, type II cuticular Hb5 OS=Homo sapiens OX=9606 GN=KRT85 PE=1 SV=1             | 6.55     | 55.8     |
| P08729     | Keratin, type II cytoskeletal 7 OS=Homo sapiens OX=9606 GN=KRT7 PE=1 SV=5             | 5.48     | 51.4     |
| P78385     | Keratin, type II cuticular Hb3 OS=Homo sapiens OX=9606 GN=KRT83 PE=1 SV=2             | 5.64     | 54.2     |
| Q3SY84     | Keratin, type II cytoskeletal 71 OS=Homo sapiens OX=9606 GN=KRT71 PE=1 SV=3           | 6.61     | 57.3     |
| Q14533     | Keratin, type II cuticular Hb1 OS=Homo sapiens OX=9606 GN=KRT81 PE=1 SV=3             | 5.47     | 54.9     |
| Q15323     | Keratin, type I cuticular Ha1 OS=Homo sapiens OX=9606 GN=KRT31 PE=1 SV=3              | 4.88     | 47.2     |
| Q14525     | Keratin, type I cuticular Ha3-II OS=Homo sapiens OX=9606 GN=KRT33B PE=1 SV=3          | 4.84     | 46.2     |
| O76009     | Keratin, type I cuticular Ha3-I OS=Homo sapiens OX=9606 GN=KRT33A PE=2 SV=2           | 4.82     | 45.9     |
| A6NCN2     | Putative keratin-87 protein OS=Homo sapiens OX=9606 GN=KRT87P PE=5 SV=4               | 5.8      | 29.1     |
| Q8N1N4     | Keratin, type II cytoskeletal 78 OS=Homo sapiens OX=9606 GN=KRT78 PE=1 SV=2           | 6.02     | 56.8     |
| Q6KB66     | Keratin, type II cytoskeletal 80 OS=Homo sapiens OX=9606 GN=KRT80 PE=1 SV=2           | 5.67     | 50.5     |
| A0A140TA69 | Keratin, type I cuticular Ha4 OS=Homo sapiens OX=9606 GN=KRT34 PE=3 SV=1              | 5.06     | 49.4     |
| Q92764     | Keratin, type I cuticular Ha5 OS=Homo sapiens OX=9606 GN=KRT35 PE=1 SV=5              | 4.91     | 50.3     |
| Q9NSB4     | Keratin, type II cuticular Hb2 OS=Homo sapiens OX=9606 GN=KRT82 PE=1 SV=3             | 6.74     | 56.6     |
| O76013     | Keratin, type I cuticular Ha6 OS=Homo sapiens OX=9606 GN=KRT36 PE=1 SV=1              | 4.94     | 52.2     |
| Q14532     | Keratin, type I cuticular Ha2 OS=Homo sapiens OX=9606 GN=KRT32 PE=1 SV=3              | 4.84     | 50.3     |
| F5H1T9     | Keratin-associated protein 2-1 OS=Homo sapiens OX=9606 GN=KRTAP2-1 PE=4 SV=1          | 7.81     | 13       |
| Q8IUC1     | Keratin-associated protein 11-1 OS=Homo sapiens OX=9606 GN=KRTAP11-1 PE=1 SV=1        | 7.9      | 17.1     |
| A0A1B0GVI3 | Keratin, type I cytoskeletal 10 (Fragment) OS=Homo sapiens OX=9606 GN=KRT10 PE=1 SV=1 | 8.44     | 10       |
| Q9BYR7     | Keratin-associated protein 3-2 OS=Homo sapiens OX=9606 GN=KRTAP3-2 PE=1 SV=1          | 5.69     | 10.4     |

**Supporting information S3.** List of 890 proteins (keratins and keratin-associated proteins were filtered out), identified over 70 runs

| Accession  | Description                                                                                                     | calc.<br>pI | MW<br>[kDa] |
|------------|-----------------------------------------------------------------------------------------------------------------|-------------|-------------|
| P02788     | Lactotransferrin OS=Homo sapiens OX=9606 GN=LTF PE=1 SV=6                                                       | 8.12        | 78.1        |
| P31025     | Lipocalin-1 OS=Homo sapiens OX=9606 GN=LCN1 PE=1 SV=1                                                           | 5.58        | 19.2        |
| O75556     | Mammaglobin-B OS=Homo sapiens OX=9606 GN=SCGB2A1 PE=1 SV=1                                                      | 5.78        | 10.9        |
| P61626     | Lysozyme C OS=Homo sapiens OX=9606 GN=LYZ PE=1 SV=1                                                             | 9.16        | 16.5        |
| P12273     | Prolactin-inducible protein OS=Homo sapiens OX=9606 GN=PIP PE=1 SV=1                                            | 8.05        | 16.6        |
| F8VV32     | 1,4-beta-N-acetylmuramidase C OS=Homo sapiens OX=9606 GN=LYZ PE=1 SV=1                                          | 9.07        | 11.5        |
| A0A0B4J259 | 1,4-beta-N-acetylmuramidase C OS=Homo sapiens OX=9606 GN=LYZ PE=1 SV=1                                          | 8.69        | 15.3        |
| P01876     | Immunoglobulin heavy constant alpha 1 OS=Homo sapiens OX=9606 GN=IGHA1 PE=1 SV=2                                | 6.51        | 37.6        |
| A0A0G2JMB2 | Immunoglobulin heavy constant alpha 2 (Fragment) OS=Homo sapiens OX=9606 GN=IGHA2 PE=1 SV=1                     | 6.1         | 36.5        |
| P01833     | Polymeric immunoglobulin receptor OS=Homo sapiens OX=9606 GN=PIGR PE=1 SV=4                                     | 5.74        | 83.2        |
| P01036     | Cystatin-S OS=Homo sapiens OX=9606 GN=CST4 PE=1 SV=3                                                            | 5.02        | 16.2        |
| P01877     | Immunoglobulin heavy constant alpha 2 OS=Homo sapiens OX=9606 GN=IGHA2 PE=1 SV=4                                | 6.27        | 36.6        |
| P98160     | Basement membrane-specific heparan sulfate proteoglycan core protein OS=Homo sapiens OX=9606 GN=HSPG2 PE=1 SV=4 | 6.51        | 468.5       |
| P01834     | Immunoglobulin kappa constant OS=Homo sapiens OX=9606 GN=IGKC PE=1 SV=2                                         | 6.52        | 11.8        |
| P02768     | Albumin OS=Homo sapiens OX=9606 GN=ALB PE=1 SV=2                                                                | 6.28        | 69.3        |
| P25311     | Zinc-alpha-2-glycoprotein OS=Homo sapiens OX=9606 GN=AZGP1 PE=1 SV=2                                            | 6.05        | 34.2        |
| P01024     | Complement C3 OS=Homo sapiens OX=9606 GN=C3 PE=1 SV=2                                                           | 6.4         | 187         |
| O95968     | Secretoglobin family 1D member 1 OS=Homo sapiens OX=9606 GN=SCGB1D1 PE=1 SV=1                                   | 9.25        | 9.9         |
| P01037     | Cystatin-SN OS=Homo sapiens OX=9606 GN=CST1 PE=1 SV=3                                                           | 7.21        | 16.4        |
| C9JEV0     | Zinc-alpha-2-glycoprotein OS=Homo sapiens OX=9606 GN=AZGP1 PE=1 SV=1                                            | 5.73        | 26.3        |
| Q99935     | Opiorphin prepropeptide OS=Homo sapiens OX=9606 GN=OPRPN PE=1 SV=2                                              | 10.42       | 27.2        |
| A0A0J9YXF8 | Proline-rich protein 4 OS=Homo sapiens OX=9606 GN=PRR4 PE=1 SV=1                                                | 7.52        | 16.9        |
| Q9UGM3     | Deleted in malignant brain tumors 1 protein OS=Homo sapiens OX=9606 GN=DMBT1 PE=1 SV=2                          | 5.44        | 260.6       |
| Q9GZZ8     | Extracellular glycoprotein lacritin OS=Homo sapiens OX=9606 GN=LACRT PE=1 SV=1                                  | 5.5         | 14.2        |
| P01591     | Immunoglobulin J chain OS=Homo sapiens OX=9606 GN=JCHAIN PE=1 SV=4                                              | 5.24        | 18.1        |
| P0DOY3     | Immunoglobulin lambda constant 3 OS=Homo sapiens OX=9606 GN=IGLC3 PE=1 SV=1                                     | 7.24        | 11.3        |
| P00450     | Ceruloplasmin OS=Homo sapiens OX=9606 GN=CP PE=1 SV=1                                                           | 5.72        | 122.1       |
| P22079     | Lactoperoxidase OS=Homo sapiens OX=9606 GN=LPO PE=1 SV=2                                                        | 8.62        | 80.2        |
| P09228     | Cystatin-SA OS=Homo sapiens OX=9606 GN=CST2 PE=1 SV=1                                                           | 4.93        | 16.4        |

|            |                                                                                                                     |      |       |
|------------|---------------------------------------------------------------------------------------------------------------------|------|-------|
| E9PFZ2     | Ceruloplasmin OS=Homo sapiens OX=9606 GN=CP PE=1 SV=1                                                               | 5.77 | 108.8 |
| A0A0B4J231 | Immunoglobulin lambda-like polypeptide 5 OS=Homo sapiens OX=9606 GN=IGLL5 PE=1 SV=1                                 | 8.84 | 23.1  |
| P10909     | Clusterin OS=Homo sapiens OX=9606 GN=CLU PE=1 SV=1                                                                  | 6.27 | 52.5  |
| Q13421     | Mesothelin OS=Homo sapiens OX=9606 GN=MSLN PE=1 SV=2                                                                | 6.38 | 68.9  |
| P01871     | Immunoglobulin heavy constant mu OS=Homo sapiens OX=9606 GN=IGHM PE=1 SV=4                                          | 6.77 | 49.4  |
| Q08380     | Galectin-3-binding protein OS=Homo sapiens OX=9606 GN=LGALS3BP PE=1 SV=1                                            | 5.27 | 65.3  |
| A0A5H1ZRQ7 | Immunoglobulin lambda constant 7 (Fragment) OS=Homo sapiens OX=9606 GN=IGLC7 PE=1 SV=1                              | 8.29 | 11.3  |
| P07602     | Prosaposin OS=Homo sapiens OX=9606 GN=PSAP PE=1 SV=2                                                                | 5.17 | 58.1  |
| P06396     | Gelsolin OS=Homo sapiens OX=9606 GN=GSN PE=1 SV=1                                                                   | 6.28 | 85.6  |
| P20061     | Transcobalamin-1 OS=Homo sapiens OX=9606 GN=TCN1 PE=1 SV=2                                                          | 5.03 | 48.2  |
| A0A3B3IRX2 | Phospholipase A2 OS=Homo sapiens OX=9606 GN=PLA2G2A PE=1 SV=1                                                       | 9.06 | 13    |
| P55058     | Phospholipid transfer protein OS=Homo sapiens OX=9606 GN=PLTP PE=1 SV=1                                             | 7.01 | 54.7  |
| P80303     | Nucleobindin-2 OS=Homo sapiens OX=9606 GN=NUCB2 PE=1 SV=3                                                           | 5.12 | 50.2  |
| A0A0C4DGN4 | Zymogen granule protein 16 homolog B OS=Homo sapiens OX=9606 GN=ZG16B PE=1 SV=1                                     | 5.95 | 19.6  |
| P07858     | Cathepsin B OS=Homo sapiens OX=9606 GN=CTSB PE=1 SV=3                                                               | 6.3  | 37.8  |
| P00738     | Haptoglobin OS=Homo sapiens OX=9606 GN=HP PE=1 SV=1                                                                 | 6.58 | 45.2  |
| A0A2Q2TTZ9 | Immunoglobulin kappa variable 1-33 OS=Homo sapiens OX=9606 GN=IGKV1D-33 PE=1 SV=1                                   | 5.34 | 11.8  |
| P80188     | Neutrophil gelatinase-associated lipocalin OS=Homo sapiens OX=9606 GN=LCN2 PE=1 SV=2                                | 8.91 | 22.6  |
| P02787     | Serotransferrin OS=Homo sapiens OX=9606 GN=TF PE=1 SV=3                                                             | 7.12 | 77    |
| P03973     | Antileukoprotease OS=Homo sapiens OX=9606 GN=SLPI PE=1 SV=2                                                         | 8.75 | 14.3  |
| P60709     | Actin, cytoplasmic 1 OS=Homo sapiens OX=9606 GN=ACTB PE=1 SV=1                                                      | 5.48 | 41.7  |
| A0A4W8ZXM2 | Immunoglobulin heavy variable 3-72 OS=Homo sapiens OX=9606 GN=IGHV3-72 PE=1 SV=1                                    | 7.97 | 11.2  |
| A0A0B4J2B5 | Immunoglobulin heavy variable 3/OR16-9 (non-functional) (Fragment) OS=Homo sapiens OX=9606 GN=IGHV3OR16-9 PE=1 SV=1 | 8.46 | 10.7  |
| Q8N474     | Secreted frizzled-related protein 1 OS=Homo sapiens OX=9606 GN=SFRP1 PE=1 SV=1                                      | 8.85 | 35.4  |
| Q14515     | SPARC-like protein 1 OS=Homo sapiens OX=9606 GN=SPARCL1 PE=1 SV=2                                                   | 4.81 | 75.2  |
| A0A1B0GVD5 | Cathepsin D OS=Homo sapiens OX=9606 GN=CTSD PE=1 SV=1                                                               | 6.54 | 44.2  |
| Q14697     | Neutral alpha-glucosidase AB OS=Homo sapiens OX=9606 GN=GANAB PE=1 SV=3                                             | 6.14 | 106.8 |
| P01011     | Alpha-1-antichymotrypsin OS=Homo sapiens OX=9606 GN=SERPINA3 PE=1 SV=2                                              | 5.52 | 47.6  |
| Q02809     | Procollagen-lysine,2-oxoglutarate 5-dioxygenase 1 OS=Homo sapiens OX=9606 GN=PLOD1 PE=1 SV=2                        | 6.95 | 83.5  |
| Q13217     | DnaJ homolog subfamily C member 3 OS=Homo sapiens OX=9606 GN=DNAJC3 PE=1 SV=1                                       | 6.15 | 57.5  |
| H3BMA1     | Mesothelin (Fragment) OS=Homo sapiens OX=9606 GN=MSLN PE=1 SV=2                                                     | 5.97 | 37.6  |
| O00391     | Sulfhydryl oxidase 1 OS=Homo sapiens OX=9606 GN=QSOX1 PE=1 SV=3                                                     | 8.92 | 82.5  |

|            |                                                                                           |      |       |
|------------|-------------------------------------------------------------------------------------------|------|-------|
| Q15782     | Chitinase-3-like protein 2 OS=Homo sapiens OX=9606 GN=CHI3L2 PE=1 SV=1                    | 7.53 | 43.5  |
| Q02818     | Nucleobindin-1 OS=Homo sapiens OX=9606 GN=NUCB1 PE=1 SV=4                                 | 5.25 | 53.8  |
| P0DUB6     | Alpha-amylase 1A OS=Homo sapiens OX=9606 GN=AMY1A PE=1 SV=1                               | 6.93 | 57.7  |
| P61769     | Beta-2-microglobulin OS=Homo sapiens OX=9606 GN=B2M PE=1 SV=1                             | 6.52 | 13.7  |
| H0YI00     | Extracellular glycoprotein lacritin (Fragment) OS=Homo sapiens OX=9606 GN=LACRT PE=1 SV=1 | 7.18 | 8.7   |
| P01034     | Cystatin-C OS=Homo sapiens OX=9606 GN=CST3 PE=1 SV=1                                      | 8.75 | 15.8  |
| P08571     | Monocyte differentiation antigen CD14 OS=Homo sapiens OX=9606 GN=CD14 PE=1 SV=2           | 6.23 | 40.1  |
| P68133     | Actin, alpha skeletal muscle OS=Homo sapiens OX=9606 GN=ACTA1 PE=1 SV=1                   | 5.39 | 42    |
| Q8NBJ4     | Golgi membrane protein 1 OS=Homo sapiens OX=9606 GN=GOLM1 PE=1 SV=1                       | 4.97 | 45.3  |
| P01009     | Alpha-1-antitrypsin OS=Homo sapiens OX=9606 GN=SERPINA1 PE=1 SV=3                         | 5.59 | 46.7  |
| P01780     | Immunoglobulin heavy variable 3-7 OS=Homo sapiens OX=9606 GN=IGHV3-7 PE=1 SV=2            | 6.57 | 12.9  |
| P01619     | Immunoglobulin kappa variable 3-20 OS=Homo sapiens OX=9606 GN=IGKV3-20 PE=1 SV=2          | 4.96 | 12.5  |
| A0A0J9YXB8 | Prosaposin (Fragment) OS=Homo sapiens OX=9606 GN=PSAP PE=1 SV=1                           | 4.88 | 18.8  |
| Q92743     | Serine protease HTRA1 OS=Homo sapiens OX=9606 GN=HTRA1 PE=1 SV=1                          | 7.83 | 51.3  |
| P04083     | Annexin A1 OS=Homo sapiens OX=9606 GN=ANXA1 PE=1 SV=2                                     | 7.02 | 38.7  |
| Q96S96     | Phosphatidylethanolamine-binding protein 4 OS=Homo sapiens OX=9606 GN=PEBP4 PE=1 SV=3     | 6.54 | 25.7  |
| P01782     | Immunoglobulin heavy variable 3-9 OS=Homo sapiens OX=9606 GN=IGHV3-9 PE=1 SV=2            | 7.08 | 12.9  |
| A0A024R6I7 | Alpha-1-antitrypsin OS=Homo sapiens OX=9606 GN=SERPINA1 PE=1 SV=1                         | 5.59 | 46.7  |
| A0A0J9YY99 | Ig-like domain-containing protein (Fragment) OS=Homo sapiens OX=9606 PE=1 SV=1            | 8.92 | 13    |
| P06733     | Alpha-enolase OS=Homo sapiens OX=9606 GN=ENO1 PE=1 SV=2                                   | 7.39 | 47.1  |
| A0A5H1ZRS2 | Immunoglobulin kappa variable 2D-28 OS=Homo sapiens OX=9606 GN=IGKV2D-28 PE=1 SV=1        | 5.24 | 11    |
| P01033     | Metalloproteinase inhibitor 1 OS=Homo sapiens OX=9606 GN=TIMP1 PE=1 SV=1                  | 8.1  | 23.2  |
| A0A0B4J1V1 | Immunoglobulin heavy variable 3-21 OS=Homo sapiens OX=9606 GN=IGHV3-21 PE=1 SV=1          | 8.28 | 12.8  |
| P01762     | Immunoglobulin heavy variable 3-11 OS=Homo sapiens OX=9606 GN=IGHV3-11 PE=1 SV=2          | 8.6  | 12.9  |
| P01857     | Immunoglobulin heavy constant gamma 1 OS=Homo sapiens OX=9606 GN=IGHG1 PE=1 SV=1          | 8.19 | 36.1  |
| P15924     | Desmoplakin OS=Homo sapiens OX=9606 GN=DSP PE=1 SV=3                                      | 6.81 | 331.6 |
| P07355     | Annexin A2 OS=Homo sapiens OX=9606 GN=ANXA2 PE=1 SV=2                                     | 7.75 | 38.6  |
| Q99574     | Neuroserpin OS=Homo sapiens OX=9606 GN=SERPINI1 PE=1 SV=1                                 | 4.91 | 46.4  |
| D6RHI9     | Ribonuclease T2 (Fragment) OS=Homo sapiens OX=9606 GN=RNASET2 PE=1 SV=8                   | 6.76 | 29.1  |
| A0A5F9UP49 | 45 kDa calcium-binding protein OS=Homo sapiens OX=9606 GN=SDF4 PE=1 SV=1                  | 4.86 | 40.9  |



|            |                                                                                     |      |       |
|------------|-------------------------------------------------------------------------------------|------|-------|
| A0A0B4J1X5 | Immunoglobulin heavy variable 3-74 OS=Homo sapiens OX=9606 GN=IGHV3-74 PE=3 SV=1    | 8.66 | 12.8  |
| P28799     | Progranulin OS=Homo sapiens OX=9606 GN=GRN PE=1 SV=2                                | 6.83 | 63.5  |
| O43490     | Prominin-1 OS=Homo sapiens OX=9606 GN=PROM1 PE=1 SV=1                               | 7.27 | 97.1  |
| P07237     | Protein disulfide-isomerase OS=Homo sapiens OX=9606 GN=P4HB PE=1 SV=3               | 4.87 | 57.1  |
| P06331     | Immunoglobulin heavy variable 4-34 OS=Homo sapiens OX=9606 GN=IGHV4-34 PE=1 SV=2    | 9.33 | 13.8  |
| P04406     | Glyceraldehyde-3-phosphate dehydrogenase OS=Homo sapiens OX=9606 GN=GAPDH PE=1 SV=3 | 8.46 | 36    |
| P01763     | Immunoglobulin heavy variable 3-48 OS=Homo sapiens OX=9606 GN=IGHV3-48 PE=1 SV=2    | 5.36 | 12.8  |
| P11021     | Endoplasmic reticulum chaperone BiP OS=Homo sapiens OX=9606 GN=HSPA5 PE=1 SV=2      | 5.16 | 72.3  |
| K7ELL7     | Glucosidase 2 subunit beta OS=Homo sapiens OX=9606 GN=PRKCSH PE=1 SV=1              | 4.41 | 60.2  |
| P01768     | Immunoglobulin heavy variable 3-30 OS=Homo sapiens OX=9606 GN=IGHV3-30 PE=1 SV=2    | 8.92 | 12.9  |
| O43852     | Calumenin OS=Homo sapiens OX=9606 GN=CALU PE=1 SV=2                                 | 4.64 | 37.1  |
| P01767     | Immunoglobulin heavy variable 3-53 OS=Homo sapiens OX=9606 GN=IGHV3-53 PE=1 SV=2    | 8.28 | 12.8  |
| P01824     | Immunoglobulin heavy variable 4-39 OS=Homo sapiens OX=9606 GN=IGHV4-39 PE=1 SV=2    | 9.26 | 13.9  |
| P02750     | Leucine-rich alpha-2-glycoprotein OS=Homo sapiens OX=9606 GN=LRG1 PE=1 SV=2         | 6.95 | 38.2  |
| A0A5H1ZRS9 | Immunoglobulin kappa variable 2D-29 OS=Homo sapiens OX=9606 GN=IGKV2D-29 PE=1 SV=1  | 5.94 | 11.2  |
| P06702     | Protein S100-A9 OS=Homo sapiens OX=9606 GN=S100A9 PE=1 SV=1                         | 6.13 | 13.2  |
| P04792     | Heat shock protein beta-1 OS=Homo sapiens OX=9606 GN=HSPB1 PE=1 SV=2                | 6.4  | 22.8  |
| A0A0C4DH25 | Immunoglobulin kappa variable 3D-20 OS=Homo sapiens OX=9606 GN=IGKV3D-20 PE=3 SV=1  | 4.59 | 12.5  |
| P12259     | Coagulation factor V OS=Homo sapiens OX=9606 GN=F5 PE=1 SV=4                        | 6.05 | 251.5 |
| A0A0C4DH38 | Immunoglobulin heavy variable 5-51 OS=Homo sapiens OX=9606 GN=IGHV5-51 PE=3 SV=1    | 8.27 | 12.7  |
| P34096     | Ribonuclease 4 OS=Homo sapiens OX=9606 GN=RNASE4 PE=1 SV=3                          | 9.03 | 16.8  |
| A0A0B4J1V0 | Immunoglobulin heavy variable 3-15 OS=Homo sapiens OX=9606 GN=IGHV3-15 PE=3 SV=1    | 8.62 | 12.9  |
| H0YLF3     | Beta-2-microglobulin (Fragment) OS=Homo sapiens OX=9606 GN=B2M PE=1 SV=1            | 5.15 | 8.5   |
| P27487     | Dipeptidyl peptidase 4 OS=Homo sapiens OX=9606 GN=DPP4 PE=1 SV=2                    | 6.04 | 88.2  |
| Q08431     | Lactadherin OS=Homo sapiens OX=9606 GN=MFGE8 PE=1 SV=3                              | 8.15 | 43.1  |
| A0A075B6K4 | Immunoglobulin lambda variable 3-10 OS=Homo sapiens OX=9606 GN=IGLV3-10 PE=3 SV=2   | 4.83 | 12.4  |
| A0A075B6R2 | Immunoglobulin heavy variable 4-4 OS=Homo sapiens OX=9606 GN=IGHV4-4 PE=3 SV=2      | 9.6  | 12.8  |
| P01764     | Immunoglobulin heavy variable 3-23 OS=Homo sapiens OX=9606 GN=IGHV3-23 PE=1 SV=2    | 8.28 | 12.6  |
| A0A0C4DH31 | Immunoglobulin heavy variable 1-18 OS=Homo sapiens OX=9606 GN=IGHV1-18 PE=3 SV=1    | 8.84 | 12.8  |

|            |                                                                                                                       |      |      |
|------------|-----------------------------------------------------------------------------------------------------------------------|------|------|
| Q6MZM9     | Proline-rich protein 27 OS=Homo sapiens OX=9606 GN=PRR27 PE=2 SV=1                                                    | 4.87 | 22.7 |
| A0A0J9YXX1 | Immunoglobulin heavy variable 5-10-1 OS=Homo sapiens OX=9606 GN=IGHV5-10-1 PE=3 SV=1                                  | 8.28 | 12.8 |
| O14773     | Tripeptidyl-peptidase 1 OS=Homo sapiens OX=9606 GN=TPP1 PE=1 SV=2                                                     | 6.48 | 61.2 |
| P03950     | Angiogenin OS=Homo sapiens OX=9606 GN=ANG PE=1 SV=1                                                                   | 9.64 | 16.5 |
| A2NVJ5     | Immunoglobulin kappa variable 2-29 OS=Homo sapiens OX=9606 GN=IGKV2-29 PE=3 SV=2                                      | 7.28 | 13.1 |
| P06312     | Immunoglobulin kappa variable 4-1 OS=Homo sapiens OX=9606 GN=IGKV4-1 PE=1 SV=1                                        | 5.25 | 13.4 |
| P09211     | Glutathione S-transferase P OS=Homo sapiens OX=9606 GN=GSTP1 PE=1 SV=2                                                | 5.64 | 23.3 |
| P29508     | Serpin B3 OS=Homo sapiens OX=9606 GN=SERPINB3 PE=1 SV=2                                                               | 6.81 | 44.5 |
| Q13162     | Peroxiredoxin-4 OS=Homo sapiens OX=9606 GN=PRDX4 PE=1 SV=1                                                            | 6.29 | 30.5 |
| P14923     | Junction plakoglobin OS=Homo sapiens OX=9606 GN=JUP PE=1 SV=3                                                         | 6.14 | 81.7 |
| A0A087WSY4 | Immunoglobulin heavy variable 4-30-2 OS=Homo sapiens OX=9606 GN=IGHV4-30-2 PE=3 SV=1                                  | 9.67 | 13   |
| D6RF35     | Gc-globulin OS=Homo sapiens OX=9606 GN=GC PE=1 SV=1                                                                   | 5.52 | 53   |
| P14618     | Pyruvate kinase PKM OS=Homo sapiens OX=9606 GN=PKM PE=1 SV=4                                                          | 7.84 | 57.9 |
| A0A075B7B8 | Immunoglobulin heavy variable 3/OR16-12 (non-functional) (Fragment) OS=Homo sapiens OX=9606 GN=IGHV3OR16-12 PE=1 SV=1 | 6.51 | 12.9 |
| P06310     | Immunoglobulin kappa variable 2-30 OS=Homo sapiens OX=9606 GN=IGKV2-30 PE=3 SV=2                                      | 8.51 | 13.2 |
| A0A087WW87 | Immunoglobulin kappa variable 2-40 OS=Homo sapiens OX=9606 GN=IGKV2-40 PE=3 SV=2                                      | 4.61 | 13.3 |
| A0A0G2JIW1 | Heat shock 70 kDa protein 1B OS=Homo sapiens OX=9606 GN=HSPA1B PE=1 SV=1                                              | 5.66 | 70.1 |
| Q8NCL4     | Polypeptide N-acetylgalactosaminyltransferase 6 OS=Homo sapiens OX=9606 GN=GALNT6 PE=2 SV=2                           | 8.18 | 71.1 |
| Q8WVQ1     | Soluble calcium-activated nucleotidase 1 OS=Homo sapiens OX=9606 GN=CANT1 PE=1 SV=1                                   | 6.09 | 44.8 |
| A0A075B6S6 | Immunoglobulin kappa variable 2D-30 OS=Homo sapiens OX=9606 GN=IGKV2D-30 PE=3 SV=1                                    | 7.99 | 13.2 |
| A0A075B6K5 | Immunoglobulin lambda variable 3-9 OS=Homo sapiens OX=9606 GN=IGLV3-9 PE=3 SV=1                                       | 7.39 | 12.3 |
| P23083     | Immunoglobulin heavy variable 1-2 OS=Homo sapiens OX=9606 GN=IGHV1-2 PE=1 SV=2                                        | 9.13 | 13.1 |
| P80748     | Immunoglobulin lambda variable 3-21 OS=Homo sapiens OX=9606 GN=IGLV3-21 PE=1 SV=2                                     | 5.29 | 12.4 |
| A0A4W9A917 | Immunoglobulin heavy constant gamma 3 (Fragment) OS=Homo sapiens OX=9606 GN=IGHG3 PE=1 SV=1                           | 7.9  | 41.3 |
| P22352     | Glutathione peroxidase 3 OS=Homo sapiens OX=9606 GN=GPX3 PE=1 SV=2                                                    | 8.13 | 25.5 |
| A0A0C4DH73 | Immunoglobulin kappa variable 1-12 OS=Homo sapiens OX=9606 GN=IGKV1-12 PE=3 SV=1                                      | 8.31 | 12.6 |
| P23284     | Peptidyl-prolyl cis-trans isomerase B OS=Homo sapiens OX=9606 GN=PPIB PE=1 SV=2                                       | 9.41 | 23.7 |
| Q14118     | Dystroglycan OS=Homo sapiens OX=9606 GN=DAG1 PE=1 SV=2                                                                | 8.56 | 97.4 |
| A0A087WT59 | Transthyretin OS=Homo sapiens OX=9606 GN=TTR PE=1 SV=2                                                                | 5.45 | 12.6 |



|            |                                                                                             |      |       |
|------------|---------------------------------------------------------------------------------------------|------|-------|
| P07686     | Beta-hexosaminidase subunit beta OS=Homo sapiens OX=9606 GN=HEXB PE=1 SV=3                  | 6.76 | 63.1  |
| A0A0B4J1U7 | Immunoglobulin heavy variable 6-1 OS=Homo sapiens OX=9606 GN=IGHV6-1 PE=3 SV=1              | 9.2  | 13.5  |
| A0A286YFJ8 | Immunoglobulin heavy constant gamma 4 (Fragment) OS=Homo sapiens OX=9606 GN=IGHG4 PE=1 SV=1 | 6.24 | 43.8  |
| A0A0J9YVY3 | Immunoglobulin heavy variable 7-4-1 OS=Homo sapiens OX=9606 GN=IGHV7-4-1 PE=3 SV=1          | 8.63 | 12.8  |
| A0A0B4J1X8 | Immunoglobulin heavy variable 3-43 OS=Homo sapiens OX=9606 GN=IGHV3-43 PE=3 SV=1            | 5.41 | 13.1  |
| P01766     | Immunoglobulin heavy variable 3-13 OS=Homo sapiens OX=9606 GN=IGHV3-13 PE=1 SV=2            | 7.08 | 12.5  |
| Q86X29     | Lipolysis-stimulated lipoprotein receptor OS=Homo sapiens OX=9606 GN=LSR PE=1 SV=4          | 7.97 | 71.4  |
| P00751     | Complement factor B OS=Homo sapiens OX=9606 GN=CFB PE=1 SV=2                                | 7.06 | 85.5  |
| P63104     | 14-3-3 protein zeta/delta OS=Homo sapiens OX=9606 GN=YWHAZ PE=1 SV=1                        | 4.79 | 27.7  |
| P04433     | Immunoglobulin kappa variable 3-11 OS=Homo sapiens OX=9606 GN=IGKV3-11 PE=1 SV=1            | 4.96 | 12.6  |
| Q92896     | Golgi apparatus protein 1 OS=Homo sapiens OX=9606 GN=GLG1 PE=1 SV=2                         | 6.9  | 134.5 |
| P30740     | Leukocyte elastase inhibitor OS=Homo sapiens OX=9606 GN=SERPINB1 PE=1 SV=1                  | 6.28 | 42.7  |
| Q9BWS9     | Chitinase domain-containing protein 1 OS=Homo sapiens OX=9606 GN=CHID1 PE=1 SV=1            | 8.63 | 44.9  |
| Q5D862     | Filaggrin-2 OS=Homo sapiens OX=9606 GN=FLG2 PE=1 SV=1                                       | 8.31 | 247.9 |
| P68104     | Elongation factor 1-alpha 1 OS=Homo sapiens OX=9606 GN=EEF1A1 PE=1 SV=1                     | 9.01 | 50.1  |
| P01743     | Immunoglobulin heavy variable 1-46 OS=Homo sapiens OX=9606 GN=IGHV1-46 PE=1 SV=2            | 8.92 | 12.9  |
| P04432     | Immunoglobulin kappa variable 1D-39 OS=Homo sapiens OX=9606 GN=IGKV1D-39 PE=3 SV=2          | 8.66 | 12.7  |
| A0A0C4DH67 | Immunoglobulin kappa variable 1-8 OS=Homo sapiens OX=9606 GN=IGKV1-8 PE=3 SV=1              | 9.01 | 12.5  |
| P49788     | Retinoic acid receptor responder protein 1 OS=Homo sapiens OX=9606 GN=RARRES1 PE=1 SV=2     | 8.51 | 33.3  |
| P05109     | Protein S100-A8 OS=Homo sapiens OX=9606 GN=S100A8 PE=1 SV=1                                 | 7.03 | 10.8  |
| A0A286YFY4 | Immunoglobulin heavy constant gamma 2 (Fragment) OS=Homo sapiens OX=9606 GN=IGHG2 PE=1 SV=1 | 6.52 | 43.8  |
| O60888     | Protein CutA OS=Homo sapiens OX=9606 GN=CUTA PE=1 SV=2                                      | 5.5  | 19.1  |
| Q9Y4L1     | Hypoxia up-regulated protein 1 OS=Homo sapiens OX=9606 GN=HYOU1 PE=1 SV=1                   | 5.22 | 111.3 |
| P60174     | Triosephosphate isomerase OS=Homo sapiens OX=9606 GN=TPI1 PE=1 SV=4                         | 6.9  | 26.7  |
| A0A075B6S5 | Immunoglobulin kappa variable 1-27 OS=Homo sapiens OX=9606 GN=IGKV1-27 PE=3 SV=1            | 8.29 | 12.7  |
| Q562R1     | Beta-actin-like protein 2 OS=Homo sapiens OX=9606 GN=ACTBL2 PE=1 SV=2                       | 5.59 | 42    |
| P36955     | Pigment epithelium-derived factor OS=Homo sapiens OX=9606 GN=SERPINF1 PE=1 SV=4             | 6.38 | 46.3  |

|            |                                                                                                                                   |       |       |
|------------|-----------------------------------------------------------------------------------------------------------------------------------|-------|-------|
| P48594     | Serpin B4 OS=Homo sapiens OX=9606 GN=SERPINB4 PE=1 SV=2                                                                           | 6.21  | 44.8  |
| P19021     | Peptidyl-glycine alpha-amidating monooxygenase OS=Homo sapiens OX=9606 GN=PAM PE=1 SV=2                                           | 6.42  | 108.3 |
| Q02413     | Desmoglein-1 OS=Homo sapiens OX=9606 GN=DSG1 PE=1 SV=2                                                                            | 5.03  | 113.7 |
| P02814     | Submaxillary gland androgen-regulated protein 3B OS=Homo sapiens OX=9606 GN=SMR3B PE=1 SV=2                                       | 9.57  | 8.2   |
| P01599     | Immunoglobulin kappa variable 1-17 OS=Homo sapiens OX=9606 GN=IGKV1-17 PE=1 SV=2                                                  | 8.68  | 12.8  |
| O95395     | Beta-1,3-galactosyl-O-glycosyl-glycoprotein beta-1,6-N-acetylglucosaminyltransferase 3 OS=Homo sapiens OX=9606 GN=GCNT3 PE=2 SV=1 | 8.25  | 50.8  |
| A0A0C4DH32 | Immunoglobulin heavy variable 3-20 OS=Homo sapiens OX=9606 GN=IGHV3-20 PE=3 SV=2                                                  | 7.87  | 12.7  |
| P07711     | Procathepsin L OS=Homo sapiens OX=9606 GN=CTSL PE=1 SV=2                                                                          | 5.45  | 37.5  |
| P08582     | Melanotransferrin OS=Homo sapiens OX=9606 GN=MELTF PE=1 SV=2                                                                      | 5.94  | 80.2  |
| P07996     | Thrombospondin-1 OS=Homo sapiens OX=9606 GN=THBS1 PE=1 SV=2                                                                       | 4.94  | 129.3 |
| P01701     | Immunoglobulin lambda variable 1-51 OS=Homo sapiens OX=9606 GN=IGLV1-51 PE=1 SV=2                                                 | 7.03  | 12.2  |
| A0A075B6R9 | Probable non-functional immunoglobulin kappa variable 2D-24 OS=Homo sapiens OX=9606 GN=IGKV2D-24 PE=1 SV=1                        | 8.87  | 13.1  |
| Q9H173     | Nucleotide exchange factor SIL1 OS=Homo sapiens OX=9606 GN=SIL1 PE=1 SV=1                                                         | 5.36  | 52.1  |
| P43251     | Biotinidase OS=Homo sapiens OX=9606 GN=BTB PE=1 SV=2                                                                              | 6.25  | 61.1  |
| Q15293     | Reticulocalbin-1 OS=Homo sapiens OX=9606 GN=RCN1 PE=1 SV=1                                                                        | 5     | 38.9  |
| Q6UXB2     | C-X-C motif chemokine 17 OS=Homo sapiens OX=9606 GN=CXCL17 PE=1 SV=1                                                              | 10.96 | 13.8  |
| P01602     | Immunoglobulin kappa variable 1-5 OS=Homo sapiens OX=9606 GN=IGKV1-5 PE=1 SV=2                                                    | 8.28  | 12.8  |
| A0A1B0GUE3 | Acid ceramidase OS=Homo sapiens OX=9606 GN=ASAH1 PE=1 SV=1                                                                        | 6.79  | 37.4  |
| P53634     | Dipeptidyl peptidase 1 OS=Homo sapiens OX=9606 GN=CTSC PE=1 SV=2                                                                  | 6.99  | 51.8  |
| A0A0B4J2H0 | Immunoglobulin heavy variable 1-69D OS=Homo sapiens OX=9606 GN=IGHV1-69D PE=1 SV=1                                                | 8.47  | 12.7  |
| P31944     | Caspase-14 OS=Homo sapiens OX=9606 GN=CASP14 PE=1 SV=2                                                                            | 5.58  | 27.7  |
| P0DP01     | Immunoglobulin heavy variable 1-8 OS=Homo sapiens OX=9606 GN=IGHV1-8 PE=3 SV=1                                                    | 9.17  | 13    |
| P81605     | Dermcidin OS=Homo sapiens OX=9606 GN=DCD PE=1 SV=2                                                                                | 6.54  | 11.3  |
| A0A0C4DH29 | Immunoglobulin heavy variable 1-3 OS=Homo sapiens OX=9606 GN=IGHV1-3 PE=3 SV=1                                                    | 9.55  | 13    |
| P08758     | Annexin A5 OS=Homo sapiens OX=9606 GN=ANXA5 PE=1 SV=2                                                                             | 5.05  | 35.9  |
| O43707     | Alpha-actinin-4 OS=Homo sapiens OX=9606 GN=ACTN4 PE=1 SV=2                                                                        | 5.44  | 104.8 |
| O75094     | Slit homolog 3 protein OS=Homo sapiens OX=9606 GN=SLIT3 PE=2 SV=3                                                                 | 7.65  | 167.6 |
| A0A087WSY6 | Immunoglobulin kappa variable 3D-15 OS=Homo sapiens OX=9606 GN=IGKV3D-15 PE=3 SV=6                                                | 5.19  | 12.5  |
| P25774     | Cathepsin S OS=Homo sapiens OX=9606 GN=CTSS PE=1 SV=3                                                                             | 8.34  | 37.5  |
| A0A087WU43 | Cadherin-1 OS=Homo sapiens OX=9606 GN=CDH1 PE=1 SV=1                                                                              | 4.94  | 71.2  |
| P15311     | Ezrin OS=Homo sapiens OX=9606 GN=EZR PE=1 SV=4                                                                                    | 6.27  | 69.4  |

|            |                                                                                                                       |       |       |
|------------|-----------------------------------------------------------------------------------------------------------------------|-------|-------|
| A0A075B6H7 | Probable non-functional immunoglobulin kappa variable 3-7 OS=Homo sapiens OX=9606 GN=IGKV3-7 PE=1 SV=1                | 5.25  | 12.8  |
| A0A087X0S5 | Collagen alpha-1(VI) chain OS=Homo sapiens OX=9606 GN=COL6A1 PE=1 SV=1                                                | 5.43  | 108.3 |
| Q9UBT3     | Dickkopf-related protein 4 OS=Homo sapiens OX=9606 GN=DKK4 PE=1 SV=1                                                  | 8.38  | 24.9  |
| O75888     | Tumor necrosis factor ligand superfamily member 13 OS=Homo sapiens OX=9606 GN=TNFSF13 PE=1 SV=1                       | 9.63  | 27.4  |
| Q01459     | Di-N-acetylchitinase OS=Homo sapiens OX=9606 GN=CTBS PE=1 SV=1                                                        | 6.64  | 43.7  |
| P62805     | Histone H4 OS=Homo sapiens OX=9606 GN=H4C1 PE=1 SV=2                                                                  | 11.36 | 11.4  |
| P31947     | 14-3-3 protein sigma OS=Homo sapiens OX=9606 GN=SFN PE=1 SV=1                                                         | 4.74  | 27.8  |
| P02647     | Apolipoprotein A-I OS=Homo sapiens OX=9606 GN=APOA1 PE=1 SV=1                                                         | 5.76  | 30.8  |
| P68371     | Tubulin beta-4B chain OS=Homo sapiens OX=9606 GN=TUBB4B PE=1 SV=1                                                     | 4.89  | 49.8  |
| A0A075B6I9 | Immunoglobulin lambda variable 7-46 OS=Homo sapiens OX=9606 GN=IGLV7-46 PE=3 SV=4                                     | 7.2   | 12.5  |
| Q5QNW6     | Histone H2B type 2-F OS=Homo sapiens OX=9606 GN=H2BC18 PE=1 SV=3                                                      | 10.32 | 13.9  |
| P48723     | Heat shock 70 kDa protein 13 OS=Homo sapiens OX=9606 GN=HSPA13 PE=1 SV=1                                              | 5.76  | 51.9  |
| P05164     | Myeloperoxidase OS=Homo sapiens OX=9606 GN=MPO PE=1 SV=1                                                              | 8.97  | 83.8  |
| Q06830     | Peroxiredoxin-1 OS=Homo sapiens OX=9606 GN=PRDX1 PE=1 SV=1                                                            | 8.13  | 22.1  |
| Q86YZ3     | Hornerin OS=Homo sapiens OX=9606 GN=HRNR PE=1 SV=2                                                                    | 10.04 | 282.2 |
| A8MTF8     | Protein FAM3B OS=Homo sapiens OX=9606 GN=FAM3B PE=1 SV=2                                                              | 8.73  | 28.3  |
| P08603     | Complement factor H OS=Homo sapiens OX=9606 GN=CFH PE=1 SV=4                                                          | 6.61  | 139   |
| Q11201     | CMP-N-acetylneuraminate-beta-galactosamide-alpha-2,3-sialyltransferase 1 OS=Homo sapiens OX=9606 GN=ST3GAL1 PE=2 SV=1 | 9.09  | 39.1  |
| Q16651     | Prostasin OS=Homo sapiens OX=9606 GN=PRSS8 PE=1 SV=1                                                                  | 5.85  | 36.4  |
| A0A075B6Q5 | Immunoglobulin heavy variable 3-64 OS=Homo sapiens OX=9606 GN=IGHV3-64 PE=3 SV=1                                      | 7.85  | 12.9  |
| P05090     | Apolipoprotein D OS=Homo sapiens OX=9606 GN=APOD PE=1 SV=1                                                            | 5.15  | 21.3  |
| Q9NZ08     | Endoplasmic reticulum aminopeptidase 1 OS=Homo sapiens OX=9606 GN=ERAP1 PE=1 SV=3                                     | 6.46  | 107.2 |
| P28325     | Cystatin-D OS=Homo sapiens OX=9606 GN=CST5 PE=1 SV=1                                                                  | 7.17  | 16.1  |
| P06865     | Beta-hexosaminidase subunit alpha OS=Homo sapiens OX=9606 GN=HEXA PE=1 SV=2                                           | 5.16  | 60.7  |
| P04211     | Immunoglobulin lambda variable 7-43 OS=Homo sapiens OX=9606 GN=IGLV7-43 PE=3 SV=2                                     | 7.03  | 12.4  |
| Q7Z7M9     | Polyptide N-acetylgalactosaminyltransferase 5 OS=Homo sapiens OX=9606 GN=GALNT5 PE=1 SV=1                             | 9.47  | 106.2 |
| P00338     | L-lactate dehydrogenase A chain OS=Homo sapiens OX=9606 GN=LDHA PE=1 SV=2                                             | 8.27  | 36.7  |
| P11717     | Cation-independent mannose-6-phosphate receptor OS=Homo sapiens OX=9606 GN=IGF2R PE=1 SV=3                            | 5.94  | 274.2 |
| A0A0C4DH34 | Immunoglobulin heavy variable 4-28 OS=Homo sapiens OX=9606 GN=IGHV4-28 PE=3 SV=1                                      | 9.29  | 13.1  |
| P01709     | Immunoglobulin lambda variable 2-8 OS=Homo sapiens OX=9606 GN=IGLV2-8 PE=1 SV=2                                       | 5.91  | 12.4  |

|            |                                                                                                   |      |       |
|------------|---------------------------------------------------------------------------------------------------|------|-------|
| P01714     | Immunoglobulin lambda variable 3-19 OS=Homo sapiens OX=9606 GN=IGLV3-19 PE=1 SV=2                 | 4.96 | 12    |
| P04430     | Immunoglobulin kappa variable 1-16 OS=Homo sapiens OX=9606 GN=IGKV1-16 PE=1 SV=2                  | 8.16 | 12.6  |
| P59665     | Neutrophil defensin 1 OS=Homo sapiens OX=9606 GN=DEFA1 PE=1 SV=1                                  | 6.99 | 10.2  |
| O00462     | Beta-mannosidase OS=Homo sapiens OX=9606 GN=MANBA PE=1 SV=3                                       | 5.52 | 100.8 |
| E9PKE3     | Heat shock cognate 71 kDa protein OS=Homo sapiens OX=9606 GN=HSPA8 PE=1 SV=1                      | 5.52 | 68.8  |
| Q86UD1     | Out at first protein homolog OS=Homo sapiens OX=9606 GN=OAF PE=2 SV=1                             | 6.84 | 30.7  |
| P00558     | Phosphoglycerate kinase 1 OS=Homo sapiens OX=9606 GN=PGK1 PE=1 SV=3                               | 8.1  | 44.6  |
| P01717     | Immunoglobulin lambda variable 3-25 OS=Homo sapiens OX=9606 GN=IGLV3-25 PE=1 SV=2                 | 4.5  | 12    |
| P07437     | Tubulin beta chain OS=Homo sapiens OX=9606 GN=TUBB PE=1 SV=2                                      | 4.89 | 49.6  |
| O75882     | Attractin OS=Homo sapiens OX=9606 GN=ATRN PE=1 SV=2                                               | 7.31 | 158.4 |
| P04350     | Tubulin beta-4A chain OS=Homo sapiens OX=9606 GN=TUBB4A PE=1 SV=2                                 | 4.88 | 49.6  |
| Q13885     | Tubulin beta-2A chain OS=Homo sapiens OX=9606 GN=TUBB2A PE=1 SV=1                                 | 4.89 | 49.9  |
| P30838     | Aldehyde dehydrogenase, dimeric NADP-preferring OS=Homo sapiens OX=9606 GN=ALDH3A1 PE=1 SV=3      | 6.54 | 50.4  |
| G3V3E8     | Epididymal secretory protein E1 OS=Homo sapiens OX=9606 GN=NPC2 PE=1 SV=1                         | 8.44 | 19.2  |
| P01700     | Immunoglobulin lambda variable 1-47 OS=Homo sapiens OX=9606 GN=IGLV1-47 PE=1 SV=2                 | 5.91 | 12.3  |
| Q86SF2     | N-acetylgalactosaminyltransferase 7 OS=Homo sapiens OX=9606 GN=GALNT7 PE=1 SV=1                   | 7.11 | 75.3  |
| O00299     | Chloride intracellular channel protein 1 OS=Homo sapiens OX=9606 GN=CLIC1 PE=1 SV=4               | 5.17 | 26.9  |
| P12814     | Alpha-actinin-1 OS=Homo sapiens OX=9606 GN=ACTN1 PE=1 SV=2                                        | 5.41 | 103   |
| Q9UBR2     | Cathepsin Z OS=Homo sapiens OX=9606 GN=CTSZ PE=1 SV=1                                             | 7.11 | 33.8  |
| Q04609     | Glutamate carboxypeptidase 2 OS=Homo sapiens OX=9606 GN=FOLH1 PE=1 SV=1                           | 6.98 | 84.3  |
| P36952     | Serpin B5 OS=Homo sapiens OX=9606 GN=SERPINB5 PE=1 SV=2                                           | 6.05 | 42.1  |
| A0A0B4J1V2 | Immunoglobulin heavy variable 2-26 OS=Homo sapiens OX=9606 GN=IGHV2-26 PE=3 SV=1                  | 8.29 | 13.2  |
| Q8NES3     | Beta-1,3-N-acetylglucosaminyltransferase lunatic fringe OS=Homo sapiens OX=9606 GN=LFNG PE=1 SV=2 | 9.17 | 41.7  |
| A0A286YFF7 | Palmitoyl-protein hydrolase 1 OS=Homo sapiens OX=9606 GN=PPT1 PE=1 SV=1                           | 6.52 | 37.1  |
| P62937     | Peptidyl-prolyl cis-trans isomerase A OS=Homo sapiens OX=9606 GN=PPIA PE=1 SV=2                   | 7.81 | 18    |
| E9PK54     | Heat shock cognate 71 kDa protein (Fragment) OS=Homo sapiens OX=9606 GN=HSPA8 PE=1 SV=8           | 7.33 | 19.9  |
| P15144     | Aminopeptidase N OS=Homo sapiens OX=9606 GN=ANPEP PE=1 SV=4                                       | 5.48 | 109.5 |

|            |                                                                                                                     |           |           |
|------------|---------------------------------------------------------------------------------------------------------------------|-----------|-----------|
| A0A0A0MS15 | Immunoglobulin heavy variable 3-49 OS=Homo sapiens OX=9606 GN=IGHV3-49 PE=3 SV=1                                    | 8.62      | 13        |
| P31151     | Protein S100-A7 OS=Homo sapiens OX=9606 GN=S100A7 PE=1 SV=4                                                         | 6.77      | 11.5      |
| Q06828     | Fibromodulin OS=Homo sapiens OX=9606 GN=FMOD PE=1 SV=2                                                              | 6.04      | 43.2      |
| P31946     | 14-3-3 protein beta/alpha OS=Homo sapiens OX=9606 GN=YWHAB PE=1 SV=3                                                | 4.83      | 28.1      |
| A0A0C4DH55 | Immunoglobulin kappa variable 3D-7 OS=Homo sapiens OX=9606 GN=IGKV3D-7 PE=3 SV=5                                    | 5.94      | 13.1      |
| Q9UNW1     | Multiple inositol polyphosphate phosphatase 1 OS=Homo sapiens OX=9606 GN=MINPP1 PE=1 SV=1                           | 7.81      | 55        |
| P62258     | 14-3-3 protein epsilon OS=Homo sapiens OX=9606 GN=YWHAE PE=1 SV=1                                                   | 4.74      | 29.2      |
| F5H5D3     | Tubulin alpha chain OS=Homo sapiens OX=9606 GN=TUBA1C PE=1 SV=1                                                     | 5.07      | 57.7      |
| P15907     | Beta-galactoside alpha-2,6-sialyltransferase 1 OS=Homo sapiens OX=9606 GN=ST6GAL1 PE=1 SV=1                         | 9.01      | 46.6      |
| P30101     | Protein disulfide-isomerase A3 OS=Homo sapiens OX=9606 GN=PDIA3 PE=1 SV=4                                           | 6.35      | 56.7      |
| P10599     | Thioredoxin OS=Homo sapiens OX=9606 GN=TXN PE=1 SV=3                                                                | 4.92      | 11.7      |
| A0A075B7D0 | Immunoglobulin heavy variable 1/OR15-1 (non-functional) (Fragment) OS=Homo sapiens OX=9606 GN=IGHV1OR15-1 PE=1 SV=1 | 9.13      | 13        |
| P26038     | Moesin OS=Homo sapiens OX=9606 GN=MSN PE=1 SV=3                                                                     | 6.4       | 67.8      |
| J3QTR3     | Ubiquitin-40S ribosomal protein S27a (Fragment) OS=Homo sapiens OX=9606 GN=RPS27A PE=1 SV=1                         | 10.1<br>4 | 12.2      |
| P26447     | Protein S100-A4 OS=Homo sapiens OX=9606 GN=S100A4 PE=1 SV=1                                                         | 6.11      | 11.7      |
| Q99519     | Sialidase-1 OS=Homo sapiens OX=9606 GN=NEU1 PE=1 SV=1                                                               | 5.88      | 45.4      |
| A0A0C4DH35 | Probable non-functional immunoglobulin heavy variable 3-35 OS=Homo sapiens OX=9606 GN=IGHV3-35 PE=1 SV=1            | 7.88      | 12.8      |
| A0A1B0GVW0 | ATPase H(+)-transporting lysosomal accessory protein 2 OS=Homo sapiens OX=9606 GN=ATP6AP2 PE=1 SV=1                 | 5.54      | 38.4      |
| G5EA09     | Syndecan binding protein (Syntenin), isoform CRA_a OS=Homo sapiens OX=9606 GN=SDCBP PE=1 SV=1                       | 8.51      | 34.8      |
| P04004     | Vitronectin OS=Homo sapiens OX=9606 GN=VTN PE=1 SV=1                                                                | 5.8       | 54.3      |
| P20930     | Filaggrin OS=Homo sapiens OX=9606 GN=FLG PE=1 SV=3                                                                  | 9.25      | 434.<br>9 |
| P15291     | Beta-1,4-galactosyltransferase 1 OS=Homo sapiens OX=9606 GN=B4GALT1 PE=1 SV=5                                       | 8.65      | 43.9      |
| Q01469     | Fatty acid-binding protein 5 OS=Homo sapiens OX=9606 GN=FABP5 PE=1 SV=3                                             | 7.01      | 15.2      |
| P22531     | Small proline-rich protein 2E OS=Homo sapiens OX=9606 GN=SPRR2E PE=2 SV=2                                           | 8.31      | 7.9       |
| Q9UJJ9     | N-acetylglucosamine-1-phosphotransferase subunit gamma OS=Homo sapiens OX=9606 GN=GNPTG PE=1 SV=1                   | 6.95      | 34        |
| P31949     | Protein S100-A11 OS=Homo sapiens OX=9606 GN=S100A11 PE=1 SV=2                                                       | 7.12      | 11.7      |
| Q6PCB0     | von Willebrand factor A domain-containing protein 1 OS=Homo sapiens OX=9606 GN=VWA1 PE=1 SV=1                       | 7.68      | 46.8      |
| Q8NBJ7     | Inactive C-alpha-formylglycine-generating enzyme 2 OS=Homo sapiens OX=9606 GN=SUMF2 PE=1 SV=2                       | 8         | 33.8      |
| A0A0B4J1V6 | Immunoglobulin heavy variable 3-73 OS=Homo sapiens OX=9606 GN=IGHV3-73 PE=3 SV=1                                    | 9.17      | 12.8      |
| E9PK25     | Cofilin, non-muscle isoform OS=Homo sapiens OX=9606 GN=CFL1 PE=1 SV=1                                               | 8.34      | 22.7      |



|            |                                                                                                                 |           |           |
|------------|-----------------------------------------------------------------------------------------------------------------|-----------|-----------|
| P04066     | Tissue alpha-L-fucosidase OS=Homo sapiens OX=9606 GN=FUCA1 PE=1 SV=4                                            | 6.84      | 53.7      |
| P01706     | Immunoglobulin lambda variable 2-11 OS=Homo sapiens OX=9606 GN=IGLV2-11 PE=1 SV=2                               | 7.24      | 12.6      |
| P52209     | 6-phosphogluconate dehydrogenase, decarboxylating OS=Homo sapiens OX=9606 GN=PGD PE=1 SV=3                      | 7.23      | 53.1      |
| P17931     | Galectin-3 OS=Homo sapiens OX=9606 GN=LGALS3 PE=1 SV=5                                                          | 8.56      | 26.1      |
| Q14393     | Growth arrest-specific protein 6 OS=Homo sapiens OX=9606 GN=GAS6 PE=1 SV=3                                      | 5.69      | 74.9      |
| Q7L7L0     | Histone H2A type 3 OS=Homo sapiens OX=9606 GN=H2AW PE=1 SV=3                                                    | 11.0<br>5 | 14.1      |
| P04075     | Fructose-bisphosphate aldolase A OS=Homo sapiens OX=9606 GN=ALDOA PE=1 SV=2                                     | 8.09      | 39.4      |
| P01715     | Immunoglobulin lambda variable 3-1 OS=Homo sapiens OX=9606 GN=IGLV3-1 PE=1 SV=2                                 | 4.94      | 12.3      |
| Q13438     | Protein OS-9 OS=Homo sapiens OX=9606 GN=OS9 PE=1 SV=1                                                           | 4.87      | 75.5      |
| A0A0J9YVU5 | Immunoglobulin heavy variable 2-70 (Fragment) OS=Homo sapiens OX=9606 GN=IGHV2-70 PE=1 SV=1                     | 8.48      | 13.4      |
| P61981     | 14-3-3 protein gamma OS=Homo sapiens OX=9606 GN=YWHAG PE=1 SV=2                                                 | 4.89      | 28.3      |
| P01721     | Immunoglobulin lambda variable 6-57 OS=Homo sapiens OX=9606 GN=IGLV6-57 PE=1 SV=2                               | 4.78      | 12.6      |
| P01023     | Alpha-2-macroglobulin OS=Homo sapiens OX=9606 GN=A2M PE=1 SV=3                                                  | 6.46      | 163.<br>2 |
| A0A0J9YX35 | Immunoglobulin heavy variable 3-64D OS=Homo sapiens OX=9606 GN=IGHV3-64D PE=3 SV=1                              | 7.85      | 12.8      |
| P07737     | Profilin-1 OS=Homo sapiens OX=9606 GN=PFN1 PE=1 SV=2                                                            | 8.27      | 15        |
| P32119     | Peroxiredoxin-2 OS=Homo sapiens OX=9606 GN=PRDX2 PE=1 SV=5                                                      | 5.97      | 21.9      |
| P68366     | Tubulin alpha-4A chain OS=Homo sapiens OX=9606 GN=TUBA4A PE=1 SV=1                                              | 5.06      | 49.9      |
| O43505     | Beta-1,4-glucuronyltransferase 1 OS=Homo sapiens OX=9606 GN=B4GAT1 PE=1 SV=1                                    | 7.2       | 47.1      |
| A0A075B7D8 | Immunoglobulin heavy variable 3/OR15-7 (pseudogene) (Fragment) OS=Homo sapiens OX=9606 GN=IGHV3OR15-7 PE=1 SV=1 | 8.28      | 13.1      |
| P27348     | 14-3-3 protein theta OS=Homo sapiens OX=9606 GN=YWHAQ PE=1 SV=1                                                 | 4.78      | 27.7      |
| Q13232     | Nucleoside diphosphate kinase 3 OS=Homo sapiens OX=9606 GN=NME3 PE=1 SV=2                                       | 7.84      | 19        |
| A0A0C4DH24 | Immunoglobulin kappa variable 6-21 OS=Homo sapiens OX=9606 GN=IGKV6-21 PE=3 SV=1                                | 7.28      | 12.4      |
| P05186     | Alkaline phosphatase, tissue-nonspecific isozyme OS=Homo sapiens OX=9606 GN=ALPL PE=1 SV=4                      | 6.67      | 57.3      |
| P35579     | Myosin-9 OS=Homo sapiens OX=9606 GN=MYH9 PE=1 SV=4                                                              | 5.6       | 226.<br>4 |
| Q08188     | Protein-glutamine gamma-glutamyltransferase E OS=Homo sapiens OX=9606 GN=TGM3 PE=1 SV=4                         | 5.86      | 76.6      |
| P98088     | Mucin-5AC OS=Homo sapiens OX=9606 GN=MUC5AC PE=1 SV=4                                                           | 7.02      | 585.<br>2 |
| O95841     | Angiopoietin-related protein 1 OS=Homo sapiens OX=9606 GN=ANGPTL1 PE=2 SV=1                                     | 8.21      | 56.7      |
| P22528     | Cornifin-B OS=Homo sapiens OX=9606 GN=SPRR1B PE=1 SV=2                                                          | 8.48      | 9.9       |



|            |                                                                                             |       |       |
|------------|---------------------------------------------------------------------------------------------|-------|-------|
| Q04917     | 14-3-3 protein eta OS=Homo sapiens OX=9606 GN=YWHAH PE=1 SV=4                               | 4.84  | 28.2  |
| P00352     | Retinal dehydrogenase 1 OS=Homo sapiens OX=9606 GN=ALDH1A1 PE=1 SV=2                        | 6.73  | 54.8  |
| P09668     | Pro-cathepsin H OS=Homo sapiens OX=9606 GN=CTSH PE=1 SV=4                                   | 8.07  | 37.4  |
| Q96DR8     | Mucin-like protein 1 OS=Homo sapiens OX=9606 GN=MUCL1 PE=1 SV=1                             | 4.64  | 9     |
| Q9HAT2     | Sialate O-acetyltransferase OS=Homo sapiens OX=9606 GN=SIAE PE=1 SV=1                       | 7.33  | 58.3  |
| Q9BUF5     | Tubulin beta-6 chain OS=Homo sapiens OX=9606 GN=TUBB6 PE=1 SV=1                             | 4.88  | 49.8  |
| Q9NRA1     | Platelet-derived growth factor C OS=Homo sapiens OX=9606 GN=PDGFC PE=1 SV=2                 | 6.14  | 39    |
| P37802     | Transgelin-2 OS=Homo sapiens OX=9606 GN=TAGLN2 PE=1 SV=3                                    | 8.25  | 22.4  |
| P30044     | Peroxiredoxin-5, mitochondrial OS=Homo sapiens OX=9606 GN=PRDX5 PE=1 SV=4                   | 8.7   | 22.1  |
| P45877     | Peptidyl-prolyl cis-trans isomerase C OS=Homo sapiens OX=9606 GN=PPIC PE=1 SV=1             | 8.4   | 22.7  |
| O75976     | Carboxypeptidase D OS=Homo sapiens OX=9606 GN=CPD PE=1 SV=2                                 | 6.05  | 152.8 |
| Q9UBC9     | Small proline-rich protein 3 OS=Homo sapiens OX=9606 GN=SPRR3 PE=1 SV=2                     | 8.57  | 18.1  |
| P13796     | Plastin-2 OS=Homo sapiens OX=9606 GN=LCP1 PE=1 SV=6                                         | 5.43  | 70.2  |
| P01703     | Immunoglobulin lambda variable 1-40 OS=Homo sapiens OX=9606 GN=IGLV1-40 PE=1 SV=2           | 5.74  | 12.3  |
| A0A5K1VW95 | Malate dehydrogenase OS=Homo sapiens OX=9606 GN=MDH1 PE=1 SV=1                              | 7.3   | 38.6  |
| P13639     | Elongation factor 2 OS=Homo sapiens OX=9606 GN=EEF2 PE=1 SV=4                               | 6.83  | 95.3  |
| P04632     | Calpain small subunit 1 OS=Homo sapiens OX=9606 GN=CAPNS1 PE=1 SV=1                         | 5.2   | 28.3  |
| A0A075B6J9 | Immunoglobulin lambda variable 2-18 OS=Homo sapiens OX=9606 GN=IGLV2-18 PE=3 SV=2           | 4.82  | 12.4  |
| Q9UBX1     | Cathepsin F OS=Homo sapiens OX=9606 GN=CTSF PE=1 SV=1                                       | 8.22  | 53.3  |
| Q99954     | Submaxillary gland androgen-regulated protein 3A OS=Homo sapiens OX=9606 GN=SMR3A PE=1 SV=2 | 9.57  | 14    |
| B7Z6Z4     | Myosin light polypeptide 6 OS=Homo sapiens OX=9606 GN=MYL6 PE=1 SV=1                        | 5.08  | 26.7  |
| A6QRJ1     | V-type proton ATPase subunit S1 (Fragment) OS=Homo sapiens OX=9606 GN=ATP6AP1 PE=1 SV=1     | 5.08  | 24.9  |
| Q96BQ1     | Protein FAM3D OS=Homo sapiens OX=9606 GN=FAM3D PE=1 SV=1                                    | 9.33  | 24.9  |
| Q08554     | Desmocollin-1 OS=Homo sapiens OX=9606 GN=DSC1 PE=1 SV=2                                     | 5.43  | 99.9  |
| A0A0B4J2D9 | Immunoglobulin kappa variable 1D-13 OS=Homo sapiens OX=9606 GN=IGKV1D-13 PE=3 SV=1          | 7.84  | 12.6  |
| P15814     | Immunoglobulin lambda-like polypeptide 1 OS=Homo sapiens OX=9606 GN=IGLL1 PE=1 SV=1         | 10.07 | 22.9  |
| P14625     | Endoplasmic reticulum protein OS=Homo sapiens OX=9606 GN=HSP90B1 PE=1 SV=1                  | 4.84  | 92.4  |
| Q9Y646     | Carboxypeptidase Q OS=Homo sapiens OX=9606 GN=CPQ PE=1 SV=1                                 | 6.18  | 51.9  |
| B1AP13     | Complement decay-accelerating factor OS=Homo sapiens OX=9606 GN=CD55 PE=1 SV=1              | 8.82  | 49.3  |
| O43405     | Cochlin OS=Homo sapiens OX=9606 GN=COCH PE=1 SV=1                                           | 7.96  | 59.4  |
| P49257     | Protein ERGIC-53 OS=Homo sapiens OX=9606 GN=LMAN1 PE=1 SV=2                                 | 6.77  | 57.5  |
| P35321     | Cornifin-A OS=Homo sapiens OX=9606 GN=SPRR1A PE=1 SV=2                                      | 8.48  | 9.9   |
| P05089     | Arginase-1 OS=Homo sapiens OX=9606 GN=ARG1 PE=1 SV=2                                        | 7.21  | 34.7  |

|            |                                                                                          |      |       |
|------------|------------------------------------------------------------------------------------------|------|-------|
| O00592     | Podocalyxin OS=Homo sapiens OX=9606 GN=PODXL PE=1 SV=2                                   | 5.49 | 58.6  |
| Q8N612     | FTS and Hook-interacting protein OS=Homo sapiens OX=9606 GN=FAM160A2 PE=1 SV=3           | 6.77 | 105.5 |
| Q9GZM7     | Tubulointerstitial nephritis antigen-like OS=Homo sapiens OX=9606 GN=TINAGL1 PE=1 SV=1   | 6.99 | 52.4  |
| P01008     | Antithrombin-III OS=Homo sapiens OX=9606 GN=SERPINC1 PE=1 SV=1                           | 6.71 | 52.6  |
| Q99538     | Legumain OS=Homo sapiens OX=9606 GN=LGMN PE=1 SV=1                                       | 6.55 | 49.4  |
| C9JEU5     | Fibrinogen gamma chain OS=Homo sapiens OX=9606 GN=FGG PE=1 SV=1                          | 6.09 | 50.3  |
| Q96P63     | Serpin B12 OS=Homo sapiens OX=9606 GN=SERPINB12 PE=1 SV=1                                | 5.53 | 46.2  |
| Q86SQ4     | Adhesion G-protein coupled receptor G6 OS=Homo sapiens OX=9606 GN=ADGRG6 PE=1 SV=3       | 7.87 | 136.6 |
| P17900     | Ganglioside GM2 activator OS=Homo sapiens OX=9606 GN=GM2A PE=1 SV=4                      | 5.31 | 20.8  |
| P40394     | All-trans-retinol dehydrogenase [NAD(+)] ADH7 OS=Homo sapiens OX=9606 GN=ADH7 PE=1 SV=2  | 7.85 | 41.5  |
| Q8WUM4     | Programmed cell death 6-interacting protein OS=Homo sapiens OX=9606 GN=PDCD6IP PE=1 SV=1 | 6.52 | 96    |
| A0A0B4J1Y8 | Immunoglobulin lambda variable 9-49 OS=Homo sapiens OX=9606 GN=IGLV9-49 PE=1 SV=1        | 7.28 | 13    |
| A0A0A0MS14 | Immunoglobulin heavy variable 1-45 OS=Homo sapiens OX=9606 GN=IGHV1-45 PE=3 SV=1         | 9.1  | 13.5  |
| P21926     | CD9 antigen OS=Homo sapiens OX=9606 GN=CD9 PE=1 SV=4                                     | 7.15 | 25.4  |
| P47929     | Galectin-7 OS=Homo sapiens OX=9606 GN=LGALS7 PE=1 SV=2                                   | 7.62 | 15.1  |
| H0YCV9     | CD44 antigen (Fragment) OS=Homo sapiens OX=9606 GN=CD44 PE=1 SV=2                        | 5.3  | 30.6  |
| Q6ZVX7     | F-box only protein 50 OS=Homo sapiens OX=9606 GN=NCCRP1 PE=1 SV=1                        | 6.62 | 30.8  |
| Q7Z406     | Myosin-14 OS=Homo sapiens OX=9606 GN=MYH14 PE=1 SV=2                                     | 5.6  | 227.7 |
| P29401     | Transketolase OS=Homo sapiens OX=9606 GN=TKT PE=1 SV=3                                   | 7.66 | 67.8  |
| Q14508     | WAP four-disulfide core domain protein 2 OS=Homo sapiens OX=9606 GN=WFDC2 PE=1 SV=2      | 4.84 | 13    |
| P30086     | Phosphatidylethanolamine-binding protein 1 OS=Homo sapiens OX=9606 GN=PEBP1 PE=1 SV=3    | 7.53 | 21    |
| Q9UBS3     | DnaJ homolog subfamily B member 9 OS=Homo sapiens OX=9606 GN=DNAJB9 PE=1 SV=1            | 8.27 | 25.5  |
| P07900     | Heat shock protein HSP 90-alpha OS=Homo sapiens OX=9606 GN=HSP90AA1 PE=1 SV=5            | 5.02 | 84.6  |
| Q13835     | Plakophilin-1 OS=Homo sapiens OX=9606 GN=PKP1 PE=1 SV=2                                  | 9.13 | 82.8  |
| P02675     | Fibrinogen beta chain OS=Homo sapiens OX=9606 GN=FGB PE=1 SV=2                           | 8.27 | 55.9  |
| P01718     | Immunoglobulin lambda variable 3-27 OS=Homo sapiens OX=9606 GN=IGLV3-27 PE=1 SV=2        | 5.01 | 12.2  |
| P02749     | Beta-2-glycoprotein 1 OS=Homo sapiens OX=9606 GN=APOH PE=1 SV=3                          | 7.97 | 38.3  |
| P02763     | Alpha-1-acid glycoprotein 1 OS=Homo sapiens OX=9606 GN=ORM1 PE=1 SV=1                    | 5.02 | 23.5  |
| P02790     | Hemopexin OS=Homo sapiens OX=9606 GN=HPX PE=1 SV=2                                       | 7.02 | 51.6  |
| A0A0A0MSQ0 | Plastin-3 OS=Homo sapiens OX=9606 GN=PLS3 PE=1 SV=1                                      | 5.94 | 69.3  |
| A0A0C4DH33 | Immunoglobulin heavy variable 1-24 OS=Homo sapiens OX=9606 GN=IGHV1-24 PE=3 SV=1         | 5.16 | 12.8  |
| Q9UBG3     | Cornulin OS=Homo sapiens OX=9606 GN=CRNN PE=1 SV=1                                       | 6.1  | 53.5  |

|            |                                                                                                                     |      |       |
|------------|---------------------------------------------------------------------------------------------------------------------|------|-------|
| O75223     | Gamma-glutamylcyclotransferase OS=Homo sapiens OX=9606 GN=GGCT PE=1 SV=1                                            | 5.14 | 21    |
| A0A0G2JSC0 | Immunoglobulin lambda variable 5-45 (Fragment) OS=Homo sapiens OX=9606 GN=IGLV5-45 PE=1 SV=1                        | 7.87 | 13.2  |
| Q9NQ84     | G-protein coupled receptor family C group 5 member C OS=Homo sapiens OX=9606 GN=GPRC5C PE=1 SV=2                    | 8.43 | 48.2  |
| A0A075B7B6 | Immunoglobulin heavy variable 4/OR15-8 (non-functional) (Fragment) OS=Homo sapiens OX=9606 GN=IGHV4OR15-8 PE=4 SV=1 | 9.6  | 13    |
| Q16706     | Alpha-mannosidase 2 OS=Homo sapiens OX=9606 GN=MAN2A1 PE=1 SV=2                                                     | 7.58 | 131.1 |
| P55064     | Aquaporin-5 OS=Homo sapiens OX=9606 GN=AQP5 PE=1 SV=1                                                               | 8.62 | 28.3  |
| O75503     | Ceroid-lipofuscinosis neuronal protein 5 OS=Homo sapiens OX=9606 GN=CLN5 PE=1 SV=2                                  | 7.4  | 41.5  |
| Q9NZT1     | Calmodulin-like protein 5 OS=Homo sapiens OX=9606 GN=CALML5 PE=1 SV=2                                               | 4.44 | 15.9  |
| J3KSD8     | Bleomycin hydrolase (Fragment) OS=Homo sapiens OX=9606 GN=BLMH PE=1 SV=8                                            | 7.46 | 30.2  |
| O60911     | Cathepsin L2 OS=Homo sapiens OX=9606 GN=CTSV PE=1 SV=2                                                              | 8.76 | 37.3  |
| P30041     | Peroxiredoxin-6 OS=Homo sapiens OX=9606 GN=PRDX6 PE=1 SV=3                                                          | 6.38 | 25    |
| P16035     | Metalloproteinase inhibitor 2 OS=Homo sapiens OX=9606 GN=TIMP2 PE=1 SV=2                                            | 7.49 | 24.4  |
| Q14764     | Major vault protein OS=Homo sapiens OX=9606 GN=MVP PE=1 SV=4                                                        | 5.48 | 99.3  |
| P18669     | Phosphoglycerate mutase 1 OS=Homo sapiens OX=9606 GN=PGAM1 PE=1 SV=2                                                | 7.18 | 28.8  |
| A0A0A0MT36 | Immunoglobulin kappa variable 6D-21 OS=Homo sapiens OX=9606 GN=IGKV6D-21 PE=3 SV=1                                  | 7.28 | 12.3  |
| P15289     | Arylsulfatase A OS=Homo sapiens OX=9606 GN=ARSA PE=1 SV=3                                                           | 6.07 | 53.6  |
| H0Y4S8     | Dyslexia-associated protein KIAA0319-like protein (Fragment) OS=Homo sapiens OX=9606 GN=KIAA0319L PE=1 SV=1         | 5.66 | 33.1  |
| P02671     | Fibrinogen alpha chain OS=Homo sapiens OX=9606 GN=FGA PE=1 SV=2                                                     | 6.01 | 94.9  |
| Q6UWP8     | Suprabasin OS=Homo sapiens OX=9606 GN=SBSN PE=1 SV=2                                                                | 7.01 | 60.5  |
| P01601     | Immunoglobulin kappa variable 1D-16 OS=Homo sapiens OX=9606 GN=IGKV1D-16 PE=3 SV=2                                  | 7.74 | 12.7  |
| P01704     | Immunoglobulin lambda variable 2-14 OS=Homo sapiens OX=9606 GN=IGLV2-14 PE=1 SV=2                                   | 6.49 | 12.6  |
| H7BZJ3     | Protein disulfide-isomerase A3 (Fragment) OS=Homo sapiens OX=9606 GN=PDIA3 PE=1 SV=1                                | 7.3  | 13.5  |
| P06737     | Glycogen phosphorylase, liver form OS=Homo sapiens OX=9606 GN=PYGL PE=1 SV=4                                        | 7.17 | 97.1  |
| P05155     | Plasma protease C1 inhibitor OS=Homo sapiens OX=9606 GN=SERPING1 PE=1 SV=2                                          | 6.55 | 55.1  |
| P04217     | Alpha-1B-glycoprotein OS=Homo sapiens OX=9606 GN=A1BG PE=1 SV=4                                                     | 5.86 | 54.2  |
| A0A075B6I0 | Immunoglobulin lambda variable 8-61 OS=Homo sapiens OX=9606 GN=IGLV8-61 PE=3 SV=7                                   | 4.55 | 12.8  |
| P22314     | Ubiquitin-like modifier-activating enzyme 1 OS=Homo sapiens OX=9606 GN=UBA1 PE=1 SV=3                               | 5.76 | 117.8 |
| P43234     | Cathepsin O OS=Homo sapiens OX=9606 GN=CTSO PE=2 SV=1                                                               | 7.42 | 35.9  |
| Q10472     | Polypeptide N-acetylgalactosaminyltransferase 1 OS=Homo sapiens OX=9606 GN=GALNT1 PE=1 SV=1                         | 7.72 | 64.2  |

|            |                                                                                                                                        |      |       |
|------------|----------------------------------------------------------------------------------------------------------------------------------------|------|-------|
| A0A0G2JRQ6 | Ig-like domain-containing protein (Fragment) OS=Homo sapiens<br>OX=9606 PE=1 SV=4                                                      | 8.29 | 12.7  |
| Q13449     | Limbic system-associated membrane protein OS=Homo sapiens<br>OX=9606 GN=LSAMP PE=1 SV=2                                                | 6.98 | 37.4  |
| O95967     | EGF-containing fibulin-like extracellular matrix protein 2 OS=Homo sapiens<br>OX=9606 GN=EFEMP2 PE=1 SV=3                              | 4.94 | 49.4  |
| Q96EU7     | C1GALT1-specific chaperone 1 OS=Homo sapiens OX=9606<br>GN=C1GALT1C1 PE=1 SV=1                                                         | 6.84 | 36.4  |
| A0A0A0MTJ2 | Sparc/osteonectin, cwcv and kazal-like domains proteoglycan (Testican)<br>3, isoform CRA_b OS=Homo sapiens OX=9606 GN=SPOCK3 PE=1 SV=1 | 5.02 | 39.4  |
| A0A2U3TZL5 | CD59 glycoprotein (Fragment) OS=Homo sapiens OX=9606 GN=CD59<br>PE=1 SV=1                                                              | 6.25 | 13.3  |
| O75874     | Isocitrate dehydrogenase [NADP] cytoplasmic OS=Homo sapiens<br>OX=9606 GN=IDH1 PE=1 SV=2                                               | 7.01 | 46.6  |
| I3L116     | Brain-specific serine protease 4 OS=Homo sapiens OX=9606 GN=PRSS22<br>PE=1 SV=1                                                        | 7.31 | 21.6  |
| P50395     | Rab GDP dissociation inhibitor beta OS=Homo sapiens OX=9606<br>GN=GDI2 PE=1 SV=2                                                       | 6.47 | 50.6  |
| P15309     | Prostatic acid phosphatase OS=Homo sapiens OX=9606 GN=ACP3 PE=1<br>SV=3                                                                | 6.24 | 44.5  |
| P04040     | Catalase OS=Homo sapiens OX=9606 GN=CAT PE=1 SV=3                                                                                      | 7.39 | 59.7  |
| D6RA82     | Annexin OS=Homo sapiens OX=9606 GN=ANXA3 PE=1 SV=1                                                                                     | 5.94 | 32.1  |
| P00390     | Glutathione reductase, mitochondrial OS=Homo sapiens OX=9606<br>GN=GSR PE=1 SV=2                                                       | 8.5  | 56.2  |
| P06744     | Glucose-6-phosphate isomerase OS=Homo sapiens OX=9606 GN=GPI<br>PE=1 SV=4                                                              | 8.32 | 63.1  |
| K7EKI8     | Periplakin OS=Homo sapiens OX=9606 GN=PPL PE=1 SV=1                                                                                    | 5.62 | 204.4 |
| P31941     | DNA dC->dU-editing enzyme APOBEC-3A OS=Homo sapiens OX=9606<br>GN=APOBEC3A PE=1 SV=3                                                   | 6.84 | 23    |
| P40121     | Macrophage-capping protein OS=Homo sapiens OX=9606 GN=CAPG<br>PE=1 SV=2                                                                | 6.19 | 38.5  |
| P01699     | Immunoglobulin lambda variable 1-44 OS=Homo sapiens OX=9606<br>GN=IGLV1-44 PE=1 SV=2                                                   | 5.17 | 12.2  |
| P15328     | Folate receptor alpha OS=Homo sapiens OX=9606 GN=FOLR1 PE=1 SV=3                                                                       | 7.97 | 29.8  |
| P49862     | Kallikrein-7 OS=Homo sapiens OX=9606 GN=KLK7 PE=1 SV=1                                                                                 | 8.47 | 27.5  |
| P08670     | Vimentin OS=Homo sapiens OX=9606 GN=VIM PE=1 SV=4                                                                                      | 5.12 | 53.6  |
| P13489     | Ribonuclease inhibitor OS=Homo sapiens OX=9606 GN=RNH1 PE=1<br>SV=2                                                                    | 4.82 | 49.9  |
| Q02487     | Desmocollin-2 OS=Homo sapiens OX=9606 GN=DSC2 PE=1 SV=1                                                                                | 5.34 | 99.9  |
| P27482     | Calmodulin-like protein 3 OS=Homo sapiens OX=9606 GN=CALML3 PE=1<br>SV=2                                                               | 4.42 | 16.9  |
| Q9BXJ1     | Complement C1q tumor necrosis factor-related protein 1 OS=Homo sapiens<br>OX=9606 GN=C1QTNF1 PE=1 SV=1                                 | 6.9  | 31.7  |
| P16152     | Carbonyl reductase [NADPH] 1 OS=Homo sapiens OX=9606 GN=CBR1<br>PE=1 SV=3                                                              | 8.32 | 30.4  |
| Q01518     | Adenylyl cyclase-associated protein 1 OS=Homo sapiens OX=9606<br>GN=CAP1 PE=1 SV=5                                                     | 8.06 | 51.9  |
| P14550     | Aldo-keto reductase family 1 member A1 OS=Homo sapiens OX=9606<br>GN=AKR1A1 PE=1 SV=3                                                  | 6.79 | 36.6  |
| O60603     | Toll-like receptor 2 OS=Homo sapiens OX=9606 GN=TLR2 PE=1 SV=1                                                                         | 6.61 | 89.8  |

|            |                                                                                                           |      |       |
|------------|-----------------------------------------------------------------------------------------------------------|------|-------|
| P01042     | Kininogen-1 OS=Homo sapiens OX=9606 GN=KNG1 PE=1 SV=2                                                     | 6.81 | 71.9  |
| P09958     | Furin OS=Homo sapiens OX=9606 GN=FURIN PE=1 SV=2                                                          | 6.47 | 86.6  |
| P07384     | Calpain-1 catalytic subunit OS=Homo sapiens OX=9606 GN=CAPN1 PE=1 SV=1                                    | 5.67 | 81.8  |
| P14780     | Matrix metalloproteinase-9 OS=Homo sapiens OX=9606 GN=MMP9 PE=1 SV=3                                      | 6.06 | 78.4  |
| Q8IWU5     | Extracellular sulfatase Sulf-2 OS=Homo sapiens OX=9606 GN=SULF2 PE=1 SV=1                                 | 9.17 | 100.4 |
| F5GXS0     | C4a anaphylatoxin OS=Homo sapiens OX=9606 GN=C4B PE=1 SV=1                                                | 7.33 | 187.6 |
| A0A6Q8PFJ0 | Prelamin-A/C OS=Homo sapiens OX=9606 GN=LMNA PE=4 SV=1                                                    | 8.27 | 80.9  |
| P61158     | Actin-related protein 3 OS=Homo sapiens OX=9606 GN=ACTR3 PE=1 SV=3                                        | 5.88 | 47.3  |
| O75083     | WD repeat-containing protein 1 OS=Homo sapiens OX=9606 GN=WDR1 PE=1 SV=4                                  | 6.65 | 66.2  |
| A0A2R8Y7R2 | Hemoglobin subunit beta OS=Homo sapiens OX=9606 GN=HBB PE=1 SV=1                                          | 6.05 | 12.2  |
| Q99497     | Parkinson disease protein 7 OS=Homo sapiens OX=9606 GN=PARK7 PE=1 SV=2                                    | 6.79 | 19.9  |
| A0A075B6K0 | Immunoglobulin lambda variable 3-16 OS=Homo sapiens OX=9606 GN=IGLV3-16 PE=3 SV=2                         | 4.65 | 12.5  |
| P50591     | Tumor necrosis factor ligand superfamily member 10 OS=Homo sapiens OX=9606 GN=TNFSF10 PE=1 SV=1           | 7.42 | 32.5  |
| Q8NFL0     | UDP-GlcNAc:betaGal beta-1,3-N-acetylglucosaminyltransferase 7 OS=Homo sapiens OX=9606 GN=B3GNT7 PE=1 SV=1 | 9.03 | 46    |
| Q5T750     | Skin-specific protein 32 OS=Homo sapiens OX=9606 GN=XP32 PE=1 SV=1                                        | 7.97 | 26.2  |
| P19652     | Alpha-1-acid glycoprotein 2 OS=Homo sapiens OX=9606 GN=ORM2 PE=1 SV=2                                     | 5.11 | 23.6  |
| P22735     | Protein-glutamine gamma-glutamyltransferase K OS=Homo sapiens OX=9606 GN=TGM1 PE=1 SV=4                   | 6.04 | 89.7  |
| A0A5F9ZHM4 | L-lactate dehydrogenase OS=Homo sapiens OX=9606 GN=LDHB PE=1 SV=1                                         | 6.25 | 37.4  |
| P17405     | Sphingomyelin phosphodiesterase OS=Homo sapiens OX=9606 GN=SMPD1 PE=1 SV=5                                | 7.28 | 69.9  |
| Q14435     | Polyptide N-acetylgalactosaminyltransferase 3 OS=Homo sapiens OX=9606 GN=GALNT3 PE=1 SV=2                 | 7.99 | 72.6  |
| P08238     | Heat shock protein HSP 90-beta OS=Homo sapiens OX=9606 GN=HSP90AB1 PE=1 SV=4                              | 5.03 | 83.2  |
| Q9Y5Z4     | Heme-binding protein 2 OS=Homo sapiens OX=9606 GN=HEBP2 PE=1 SV=1                                         | 4.63 | 22.9  |
| P21980     | Protein-glutamine gamma-glutamyltransferase 2 OS=Homo sapiens OX=9606 GN=TGM2 PE=1 SV=2                   | 5.22 | 77.3  |
| J3KPJ0     | Glutathione hydrolase 6 OS=Homo sapiens OX=9606 GN=GGT6 PE=1 SV=1                                         | 6.14 | 51.1  |
| Q6NUJ1     | Proactivator polypeptide-like 1 OS=Homo sapiens OX=9606 GN=PSAPL1 PE=2 SV=2                               | 7.27 | 56.6  |
| U3KPS2     | Myeloblastin OS=Homo sapiens OX=9606 GN=PRTN3 PE=1 SV=1                                                   | 8.16 | 23.6  |
| P42357     | Histidine ammonia-lyase OS=Homo sapiens OX=9606 GN=HAL PE=1 SV=1                                          | 6.95 | 72.7  |
| P27797     | Calreticulin OS=Homo sapiens OX=9606 GN=CALR PE=1 SV=1                                                    | 4.44 | 48.1  |



|            |                                                                                                              |       |       |
|------------|--------------------------------------------------------------------------------------------------------------|-------|-------|
| A2IBA6     | Lipase member H OS=Homo sapiens OX=9606 GN=LIPH PE=1 SV=1                                                    | 8.15  | 47.2  |
| P18510     | Interleukin-1 receptor antagonist protein OS=Homo sapiens OX=9606 GN=IL1RN PE=1 SV=1                         | 6.19  | 20    |
| Q9HBR0     | Putative sodium-coupled neutral amino acid transporter 10 OS=Homo sapiens OX=9606 GN=SLC38A10 PE=1 SV=2      | 5.73  | 119.7 |
| P01817     | Immunoglobulin heavy variable 2-5 OS=Homo sapiens OX=9606 GN=IGHV2-5 PE=1 SV=2                               | 8.29  | 13.2  |
| P08311     | Cathepsin G OS=Homo sapiens OX=9606 GN=CTSG PE=1 SV=2                                                        | 11.19 | 28.8  |
| P46940     | Ras GTPase-activating-like protein IQGAP1 OS=Homo sapiens OX=9606 GN=IQGAP1 PE=1 SV=1                        | 6.48  | 189.1 |
| P41218     | Myeloid cell nuclear differentiation antigen OS=Homo sapiens OX=9606 GN=MNDA PE=1 SV=1                       | 9.76  | 45.8  |
| P01019     | Angiotensinogen OS=Homo sapiens OX=9606 GN=AGT PE=1 SV=1                                                     | 6.32  | 53.1  |
| Q09666     | Neuroblast differentiation-associated protein AHNAK OS=Homo sapiens OX=9606 GN=AHNAK PE=1 SV=2               | 6.15  | 628.7 |
| E7EWC6     | DNA-directed RNA polymerase II subunit RPB11-b2 (Fragment) OS=Homo sapiens OX=9606 GN=POLR2J3 PE=4 SV=1      | 8.47  | 30.4  |
| Q9NS98     | Semaphorin-3G OS=Homo sapiens OX=9606 GN=SEMA3G PE=1 SV=1                                                    | 7.78  | 86.6  |
| O14745     | Na(+)/H(+) exchange regulatory cofactor NHE-RF1 OS=Homo sapiens OX=9606 GN=SLC9A3R1 PE=1 SV=4                | 5.77  | 38.8  |
| P49913     | Cathelicidin antimicrobial peptide OS=Homo sapiens OX=9606 GN=CAMP PE=1 SV=1                                 | 9.41  | 19.3  |
| A0A0D9SF54 | Spectrin alpha chain, non-erythrocytic 1 OS=Homo sapiens OX=9606 GN=SPTAN1 PE=1 SV=1                         | 5.34  | 282.7 |
| A0A140T953 | HLA class I histocompatibility antigen, B alpha chain (Fragment) OS=Homo sapiens OX=9606 GN=HLA-B PE=1 SV=1  | 6.44  | 27.7  |
| Q9Y2A9     | N-acetyllactosaminide beta-1,3-N-acetylglucosaminyltransferase 3 OS=Homo sapiens OX=9606 GN=B3GNT3 PE=1 SV=2 | 8.68  | 42.5  |
| A0A087X1Z3 | Proteasome activator complex subunit 2 OS=Homo sapiens OX=9606 GN=PSME2 PE=1 SV=1                            | 6.71  | 29.1  |
| O95793     | Double-stranded RNA-binding protein Staufien homolog 1 OS=Homo sapiens OX=9606 GN=STAU1 PE=1 SV=2            | 9.44  | 63.1  |
| O95994     | Anterior gradient protein 2 homolog OS=Homo sapiens OX=9606 GN=AGR2 PE=1 SV=1                                | 9     | 20    |
| Q9UHD0     | Interleukin-19 OS=Homo sapiens OX=9606 GN=IL19 PE=1 SV=2                                                     | 7.69  | 20.4  |
| P54802     | Alpha-N-acetylglucosaminidase OS=Homo sapiens OX=9606 GN=NAGLU PE=1 SV=2                                     | 6.65  | 82.2  |
| A0A1R3UHJ7 | Kallikrein M OS=Homo sapiens OX=9606 GN=KLK14 PE=1 SV=1                                                      | 8.98  | 27.4  |
| P09467     | Fructose-1,6-bisphosphatase 1 OS=Homo sapiens OX=9606 GN=FBP1 PE=1 SV=5                                      | 6.99  | 36.8  |
| A0A0B4J1U3 | Immunoglobulin lambda variable 1-36 OS=Homo sapiens OX=9606 GN=IGLV1-36 PE=1 SV=5                            | 4.78  | 12.5  |
| H7C0V9     | ABPP (Fragment) OS=Homo sapiens OX=9606 GN=APP PE=1 SV=1                                                     | 4.82  | 55.1  |
| P11413     | Glucose-6-phosphate 1-dehydrogenase OS=Homo sapiens OX=9606 GN=G6PD PE=1 SV=4                                | 6.84  | 59.2  |
| Q9NZP8     | Complement C1r subcomponent-like protein OS=Homo sapiens OX=9606 GN=C1RL PE=1 SV=2                           | 7.2   | 53.5  |
| P02765     | Alpha-2-HS-glycoprotein OS=Homo sapiens OX=9606 GN=AHSG PE=1 SV=2                                            | 5.72  | 39.3  |
| P00734     | Prothrombin OS=Homo sapiens OX=9606 GN=F2 PE=1 SV=2                                                          | 5.9   | 70    |



|            |                                                                                                                   |       |       |
|------------|-------------------------------------------------------------------------------------------------------------------|-------|-------|
| F8VWW8     | Acid sphingomyelinase-like phosphodiesterase 3b OS=Homo sapiens<br>OX=9606 GN=SMPDL3B PE=1 SV=1                   | 5.34  | 45.3  |
| A0A087WVQ6 | Clathrin heavy chain OS=Homo sapiens OX=9606 GN=CLTC PE=1 SV=1                                                    | 5.69  | 191.9 |
| Q16270     | Insulin-like growth factor-binding protein 7 OS=Homo sapiens OX=9606<br>GN=IGFBP7 PE=1 SV=1                       | 7.9   | 29.1  |
| K7EKI0     | Envoplakin OS=Homo sapiens OX=9606 GN=EVPL PE=1 SV=1                                                              | 7.25  | 233.7 |
| Q15365     | Poly(rC)-binding protein 1 OS=Homo sapiens OX=9606 GN=PCBP1 PE=1<br>SV=2                                          | 7.09  | 37.5  |
| C9JU00     | Fibrinogen gamma chain (Fragment) OS=Homo sapiens OX=9606<br>GN=FGG PE=1 SV=1                                     | 7.2   | 14    |
| A0A140T9H5 | HLA class I histocompatibility antigen, C alpha chain OS=Homo sapiens<br>OX=9606 GN=HLA-C PE=1 SV=1               | 6     | 41.3  |
| P61224     | Ras-related protein Rap-1b OS=Homo sapiens OX=9606 GN=RAP1B<br>PE=1 SV=1                                          | 5.78  | 20.8  |
| P52566     | Rho GDP-dissociation inhibitor 2 OS=Homo sapiens OX=9606<br>GN=ARHGDIB PE=1 SV=3                                  | 5.21  | 23    |
| P21246     | Pleiotrophin OS=Homo sapiens OX=9606 GN=PTN PE=1 SV=1                                                             | 9.6   | 18.9  |
| P00747     | Plasminogen OS=Homo sapiens OX=9606 GN=PLG PE=1 SV=2                                                              | 7.24  | 90.5  |
| O75629     | Protein CREG1 OS=Homo sapiens OX=9606 GN=CREG1 PE=1 SV=1                                                          | 7.59  | 24.1  |
| A0A0J9YX89 | Selenoprotein F (Fragment) OS=Homo sapiens OX=9606 GN=SELENOF<br>PE=1 SV=1                                        | 5     | 10.2  |
| E7EPV7     | Alpha-synuclein OS=Homo sapiens OX=9606 GN=SNCA PE=1 SV=1                                                         | 9.23  | 11.8  |
| P0DP25     | Calmodulin-3 OS=Homo sapiens OX=9606 GN=CALM3 PE=1 SV=1                                                           | 4.22  | 16.8  |
| Q5JR08     | Rho-related GTP-binding protein RhoC (Fragment) OS=Homo sapiens<br>OX=9606 GN=RHOC PE=1 SV=8                      | 6.58  | 21.5  |
| P04080     | Cystatin-B OS=Homo sapiens OX=9606 GN=CSTB PE=1 SV=2                                                              | 7.56  | 11.1  |
| Q9BTY2     | Plasma alpha-L-fucosidase OS=Homo sapiens OX=9606 GN=FUCA2 PE=1<br>SV=2                                           | 6.25  | 54    |
| O75355     | Ectonucleoside triphosphate diphosphohydrolase 3 OS=Homo sapiens<br>OX=9606 GN=ENTPD3 PE=1 SV=2                   | 6.42  | 59.1  |
| Q9HCY8     | Protein S100-A14 OS=Homo sapiens OX=9606 GN=S100A14 PE=1 SV=1                                                     | 5.24  | 11.7  |
| B1AK87     | F-actin-capping protein subunit beta OS=Homo sapiens OX=9606<br>GN=CAPZB PE=1 SV=2                                | 5.55  | 27.4  |
| P51993     | 4-galactosyl-N-acetylglucosaminide 3-alpha-L-fucosyltransferase FUT6<br>OS=Homo sapiens OX=9606 GN=FUT6 PE=1 SV=1 | 8.68  | 41.8  |
| D6RC73     | C-C motif chemokine 28 OS=Homo sapiens OX=9606 GN=CCL28 PE=1<br>SV=1                                              | 10.49 | 9.3   |
| A0A0C4DH36 | Probable non-functional immunoglobulin heavy variable 3-38 OS=Homo<br>sapiens OX=9606 GN=IGHV3-38 PE=1 SV=1       | 9.25  | 12.8  |
| F8WE86     | Transcobalamin-2 OS=Homo sapiens OX=9606 GN=TCN2 PE=1 SV=2                                                        | 7.25  | 44.8  |
| P33908     | Mannosyl-oligosaccharide 1,2-alpha-mannosidase IA OS=Homo sapiens<br>OX=9606 GN=MAN1A1 PE=1 SV=3                  | 6.47  | 72.9  |
| P55072     | Transitional endoplasmic reticulum ATPase OS=Homo sapiens OX=9606<br>GN=VCP PE=1 SV=4                             | 5.26  | 89.3  |
| P10253     | Lysosomal alpha-glucosidase OS=Homo sapiens OX=9606 GN=GAA PE=1<br>SV=4                                           | 6     | 105.3 |
| Q13183     | Solute carrier family 13 member 2 OS=Homo sapiens OX=9606<br>GN=SLC13A2 PE=1 SV=1                                 | 7.01  | 64.4  |

|            |                                                                                                                   |      |      |
|------------|-------------------------------------------------------------------------------------------------------------------|------|------|
| Q16769     | Glutaminyl-peptide cyclotransferase OS=Homo sapiens OX=9606 GN=QPCT PE=1 SV=1                                     | 6.61 | 40.9 |
| O95969     | Secretoglobin family 1D member 2 OS=Homo sapiens OX=9606 GN=SCGB1D2 PE=2 SV=1                                     | 8.25 | 9.9  |
| P21964     | Catechol O-methyltransferase OS=Homo sapiens OX=9606 GN=COMT PE=1 SV=2                                            | 5.47 | 30   |
| P14174     | Macrophage migration inhibitory factor OS=Homo sapiens OX=9606 GN=MIF PE=1 SV=4                                   | 7.88 | 12.5 |
| P37837     | Transaldolase OS=Homo sapiens OX=9606 GN=TALDO1 PE=1 SV=2                                                         | 6.81 | 37.5 |
| P26572     | Alpha-1,3-mannosyl-glycoprotein 2-beta-N-acetylglucosaminyltransferase OS=Homo sapiens OX=9606 GN=MGAT1 PE=1 SV=2 | 9.16 | 50.8 |
| Q14050     | Collagen alpha-3(IX) chain OS=Homo sapiens OX=9606 GN=COL9A3 PE=1 SV=2                                            | 7.68 | 63.6 |
| P0DTE1     | Probable non-functional immunoglobulin heavy variable 3-38-3 OS=Homo sapiens OX=9606 GN=IGHV3-38-3 PE=1 SV=1      | 9.25 | 12.7 |
| P25815     | Protein S100-P OS=Homo sapiens OX=9606 GN=S100P PE=1 SV=2                                                         | 4.88 | 10.4 |
| O15144     | Actin-related protein 2/3 complex subunit 2 OS=Homo sapiens OX=9606 GN=ARPC2 PE=1 SV=1                            | 7.36 | 34.3 |
| O60784     | Target of Myb protein 1 OS=Homo sapiens OX=9606 GN=TOM1 PE=1 SV=2                                                 | 4.7  | 53.8 |
| P62834     | Ras-related protein Rap-1A OS=Homo sapiens OX=9606 GN=RAP1A PE=1 SV=1                                             | 6.67 | 21   |
| D6RHX1     | Mucin-7 (Fragment) OS=Homo sapiens OX=9606 GN=MUC7 PE=1 SV=1                                                      | 10.0 | 7    |
| P02649     | Apolipoprotein E OS=Homo sapiens OX=9606 GN=APOE PE=1 SV=1                                                        | 5.73 | 36.1 |
| A0A075B6J1 | Immunoglobulin lambda variable 5-37 OS=Homo sapiens OX=9606 GN=IGLV5-37 PE=3 SV=1                                 | 4.94 | 13.3 |
| P30085     | UMP-CMP kinase OS=Homo sapiens OX=9606 GN=CMPK1 PE=1 SV=3                                                         | 5.57 | 22.2 |
| P09960     | Leukotriene A-4 hydrolase OS=Homo sapiens OX=9606 GN=LTA4H PE=1 SV=2                                              | 6.18 | 69.2 |
| P19971     | Thymidine phosphorylase OS=Homo sapiens OX=9606 GN=TYMP PE=1 SV=2                                                 | 5.53 | 49.9 |
| P21741     | Midkine OS=Homo sapiens OX=9606 GN=MDK PE=1 SV=1                                                                  | 9.79 | 15.6 |
| Q9ULZ3     | Apoptosis-associated speck-like protein containing a CARD OS=Homo sapiens OX=9606 GN=PYCARD PE=1 SV=2             | 6.34 | 21.6 |
| Q92820     | Gamma-glutamyl hydrolase OS=Homo sapiens OX=9606 GN=GGH PE=1 SV=2                                                 | 7.11 | 35.9 |
| P59998     | Actin-related protein 2/3 complex subunit 4 OS=Homo sapiens OX=9606 GN=ARPC4 PE=1 SV=3                            | 8.43 | 19.7 |
| O95084     | Serine protease 23 OS=Homo sapiens OX=9606 GN=PRSS23 PE=1 SV=1                                                    | 9.42 | 43   |
| Q96MK3     | Pseudokinase FAM20A OS=Homo sapiens OX=9606 GN=FAM20A PE=1 SV=4                                                   | 7.99 | 61.4 |
| Q07654     | Trefoil factor 3 OS=Homo sapiens OX=9606 GN=TFF3 PE=1 SV=2                                                        | 6.92 | 10.2 |
| A0A075B6S9 | Probable non-functional immunoglobulin kappa variable 1-37 OS=Homo sapiens OX=9606 GN=IGKV1-37 PE=1 SV=7          | 9.25 | 12.7 |
| P01040     | Cystatin-A OS=Homo sapiens OX=9606 GN=CSTA PE=1 SV=1                                                              | 5.5  | 11   |
| P05091     | Aldehyde dehydrogenase, mitochondrial OS=Homo sapiens OX=9606 GN=ALDH2 PE=1 SV=2                                  | 7.05 | 56.3 |
| P00491     | Purine nucleoside phosphorylase OS=Homo sapiens OX=9606 GN=PNP PE=1 SV=2                                          | 6.95 | 32.1 |

|            |                                                                                                                            |      |      |
|------------|----------------------------------------------------------------------------------------------------------------------------|------|------|
| P04196     | Histidine-rich glycoprotein OS=Homo sapiens OX=9606 GN=HRG PE=1 SV=1                                                       | 7.5  | 59.5 |
| P08246     | Neutrophil elastase OS=Homo sapiens OX=9606 GN=ELANE PE=1 SV=1                                                             | 9.35 | 28.5 |
| Q9UI42     | Carboxypeptidase A4 OS=Homo sapiens OX=9606 GN=CPA4 PE=1 SV=2                                                              | 6.7  | 47.3 |
| P15531     | Nucleoside diphosphate kinase A OS=Homo sapiens OX=9606 GN=NME1 PE=1 SV=1                                                  | 6.19 | 17.1 |
| Q96FQ6     | Protein S100-A16 OS=Homo sapiens OX=9606 GN=S100A16 PE=1 SV=1                                                              | 6.79 | 11.8 |
| O60664     | Perilipin-3 OS=Homo sapiens OX=9606 GN=PLIN3 PE=1 SV=3                                                                     | 5.44 | 47   |
| Q8NI22     | Multiple coagulation factor deficiency protein 2 OS=Homo sapiens OX=9606 GN=MCFD2 PE=1 SV=1                                | 4.63 | 16.4 |
| P35475     | Alpha-L-iduronidase OS=Homo sapiens OX=9606 GN=IDUA PE=1 SV=2                                                              | 9.14 | 72.6 |
| P11279     | Lysosome-associated membrane glycoprotein 1 OS=Homo sapiens OX=9606 GN=LAMP1 PE=1 SV=3                                     | 8.75 | 44.9 |
| F6RFD5     | Actin-depolymerizing factor OS=Homo sapiens OX=9606 GN=DSTN PE=1 SV=1                                                      | 8.59 | 15.4 |
| E9PRJ8     | Tetraspanin (Fragment) OS=Homo sapiens OX=9606 GN=CD81 PE=1 SV=1                                                           | 6.15 | 22.5 |
| Q9UN76     | Sodium- and chloride-dependent neutral and basic amino acid transporter B(0+) OS=Homo sapiens OX=9606 GN=SLC6A14 PE=2 SV=1 | 8.19 | 72.1 |
| P09237     | Matrilysin OS=Homo sapiens OX=9606 GN=MMP7 PE=1 SV=1                                                                       | 7.91 | 29.7 |
| F8W6I7     | Helix-destabilizing protein OS=Homo sapiens OX=9606 GN=HNRNPA1 PE=1 SV=2                                                   | 9.13 | 33.1 |
| A0A3B3IUC4 | Alpha-galactosidase OS=Homo sapiens OX=9606 GN=GLA PE=1 SV=1                                                               | 5.86 | 53.2 |
| A8K2U0     | Alpha-2-macroglobulin-like protein 1 OS=Homo sapiens OX=9606 GN=A2ML1 PE=1 SV=3                                            | 5.73 | 161  |
| Q8NBS9     | Thioredoxin domain-containing protein 5 OS=Homo sapiens OX=9606 GN=TXNDC5 PE=1 SV=2                                        | 5.97 | 47.6 |
| P13473     | Lysosome-associated membrane glycoprotein 2 OS=Homo sapiens OX=9606 GN=LAMP2 PE=1 SV=2                                     | 5.63 | 44.9 |
| Q9HC84     | Mucin-5B OS=Homo sapiens OX=9606 GN=MUC5B PE=1 SV=3                                                                        | 6.64 | 596  |
| P17655     | Calpain-2 catalytic subunit OS=Homo sapiens OX=9606 GN=CAPN2 PE=1 SV=6                                                     | 4.98 | 79.9 |
| Q5SGD2     | Protein phosphatase 1L OS=Homo sapiens OX=9606 GN=PPM1L PE=1 SV=1                                                          | 5.87 | 41   |
| Q12841     | Follistatin-related protein 1 OS=Homo sapiens OX=9606 GN=FSTL1 PE=1 SV=1                                                   | 5.52 | 35   |
| A0A0U1RQV3 | EGF-containing fibulin-like extracellular matrix protein 1 (Fragment) OS=Homo sapiens OX=9606 GN=EFEMP1 PE=1 SV=1          | 6.62 | 31.7 |
| P20933     | N(4)-(beta-N-acetylglucosaminyl)-L-asparaginase OS=Homo sapiens OX=9606 GN=AGA PE=1 SV=2                                   | 6.28 | 37.2 |
| A0A075B6H9 | Immunoglobulin lambda variable 4-69 OS=Homo sapiens OX=9606 GN=IGLV4-69 PE=1 SV=1                                          | 6.51 | 12.8 |
| P31146     | Coronin-1A OS=Homo sapiens OX=9606 GN=CORO1A PE=1 SV=4                                                                     | 6.68 | 51   |
| O15143     | Actin-related protein 2/3 complex subunit 1B OS=Homo sapiens OX=9606 GN=ARPC1B PE=1 SV=3                                   | 8.35 | 40.9 |
| Q9UHL4     | Dipeptidyl peptidase 2 OS=Homo sapiens OX=9606 GN=DPP7 PE=1 SV=3                                                           | 6.32 | 54.3 |
| P43490     | Nicotinamide phosphoribosyltransferase OS=Homo sapiens OX=9606 GN=NAMPT PE=1 SV=1                                          | 7.15 | 55.5 |
| O14657     | Torsin-1B OS=Homo sapiens OX=9606 GN=TOR1B PE=1 SV=2                                                                       | 8.54 | 38   |
| Q14574     | Desmocollin-3 OS=Homo sapiens OX=9606 GN=DSC3 PE=1 SV=3                                                                    | 6.1  | 99.9 |

|            |                                                                                                            |       |       |
|------------|------------------------------------------------------------------------------------------------------------|-------|-------|
| O00115     | Deoxyribonuclease-2-alpha OS=Homo sapiens OX=9606 GN=DNASE2 PE=1 SV=2                                      | 8.05  | 39.6  |
| P61204     | ADP-ribosylation factor 3 OS=Homo sapiens OX=9606 GN=ARF3 PE=1 SV=2                                        | 7.43  | 20.6  |
| P47895     | Aldehyde dehydrogenase family 1 member A3 OS=Homo sapiens OX=9606 GN=ALDH1A3 PE=1 SV=2                     | 7.25  | 56.1  |
| A0A0G2JLB3 | Glucosylceramidase OS=Homo sapiens OX=9606 GN=GBA PE=1 SV=1                                                | 7.42  | 59.6  |
| P19823     | Inter-alpha-trypsin inhibitor heavy chain H2 OS=Homo sapiens OX=9606 GN=ITIH2 PE=1 SV=2                    | 6.86  | 106.4 |
| P62879     | Guanine nucleotide-binding protein G(I)/G(S)/G(T) subunit beta-2 OS=Homo sapiens OX=9606 GN=GNB2 PE=1 SV=3 | 6     | 37.3  |
| I3L0K2     | Thioredoxin domain-containing protein 17 OS=Homo sapiens OX=9606 GN=TXNDC17 PE=1 SV=1                      | 5.76  | 8.4   |
| Q06323     | Proteasome activator complex subunit 1 OS=Homo sapiens OX=9606 GN=PSME1 PE=1 SV=1                          | 6.02  | 28.7  |
| A0A087WY61 | Nuclear mitotic apparatus protein 1 OS=Homo sapiens OX=9606 GN=NUMA1 PE=1 SV=1                             | 5.92  | 236   |
| O14950     | Myosin regulatory light chain 12B OS=Homo sapiens OX=9606 GN=MYL12B PE=1 SV=2                              | 4.84  | 19.8  |
| Q92928     | Putative Ras-related protein Rab-1C OS=Homo sapiens OX=9606 GN=RAB1C PE=5 SV=2                             | 5.43  | 22    |
| P52790     | Hexokinase-3 OS=Homo sapiens OX=9606 GN=HK3 PE=1 SV=2                                                      | 5.4   | 99    |
| Q15084     | Protein disulfide-isomerase A6 OS=Homo sapiens OX=9606 GN=PDIA6 PE=1 SV=1                                  | 5.08  | 48.1  |
| Q96TA1     | Protein Niban 2 OS=Homo sapiens OX=9606 GN=NIBAN2 PE=1 SV=3                                                | 6.19  | 84.1  |
| Q16665     | Hypoxia-inducible factor 1-alpha OS=Homo sapiens OX=9606 GN=HIF1A PE=1 SV=1                                | 5.33  | 92.6  |
| P08865     | 40S ribosomal protein SA OS=Homo sapiens OX=9606 GN=RPSA PE=1 SV=4                                         | 4.87  | 32.8  |
| Q9HB40     | Retinoid-inducible serine carboxypeptidase OS=Homo sapiens OX=9606 GN=SCPEP1 PE=1 SV=1                     | 5.81  | 50.8  |
| K7EQM7     | Urea transporter 1 OS=Homo sapiens OX=9606 GN=SLC14A1 PE=1 SV=2                                            | 5.63  | 23.3  |
| Q96KP4     | Cytosolic non-specific dipeptidase OS=Homo sapiens OX=9606 GN=CNBP2 PE=1 SV=2                              | 5.97  | 52.8  |
| Q13332     | Receptor-type tyrosine-protein phosphatase S OS=Homo sapiens OX=9606 GN=PTPRS PE=1 SV=3                    | 6.46  | 216.9 |
| Q53RT3     | Retroviral-like aspartic protease 1 OS=Homo sapiens OX=9606 GN=ASPRV1 PE=1 SV=1                            | 5.44  | 37    |
| P16402     | Histone H1.3 OS=Homo sapiens OX=9606 GN=H1-3 PE=1 SV=2                                                     | 11.02 | 22.3  |
| P58107     | Epiplakin OS=Homo sapiens OX=9606 GN=EPPK1 PE=1 SV=3                                                       | 5.62  | 555.3 |
| J3KPA1     | Cysteine-rich secretory protein 3 OS=Homo sapiens OX=9606 GN=CRISP3 PE=1 SV=1                              | 7.61  | 31    |
| A0A087WY35 | Integrin beta-like protein 1 OS=Homo sapiens OX=9606 GN=ITGBL1 PE=1 SV=1                                   | 5.4   | 48.5  |
| Q8N695     | Sodium-coupled monocarboxylate transporter 1 OS=Homo sapiens OX=9606 GN=SLC5A8 PE=1 SV=2                   | 7.75  | 66.5  |
| P19827     | Inter-alpha-trypsin inhibitor heavy chain H1 OS=Homo sapiens OX=9606 GN=ITIH1 PE=1 SV=3                    | 6.79  | 101.3 |
| Q9Y337     | Kallikrein-5 OS=Homo sapiens OX=9606 GN=KLK5 PE=1 SV=3                                                     | 8.27  | 32    |

|            |                                                                                                            |      |       |
|------------|------------------------------------------------------------------------------------------------------------|------|-------|
| P60842     | Eukaryotic initiation factor 4A-I OS=Homo sapiens OX=9606 GN=EIF4A1 PE=1 SV=1                              | 5.48 | 46.1  |
| O14672     | Disintegrin and metalloproteinase domain-containing protein 10 OS=Homo sapiens OX=9606 GN=ADAM10 PE=1 SV=1 | 7.77 | 84.1  |
| P10619     | Lysosomal protective protein OS=Homo sapiens OX=9606 GN=CTSA PE=1 SV=2                                     | 6.61 | 54.4  |
| J3KN67     | Tropomyosin alpha-3 chain OS=Homo sapiens OX=9606 GN=TPM3 PE=1 SV=1                                        | 4.77 | 33.2  |
| Q8N4A0     | Polypeptide N-acetylgalactosaminyltransferase 4 OS=Homo sapiens OX=9606 GN=GALNT4 PE=1 SV=2                | 7.61 | 66.6  |
| Q86VR7     | V-set and immunoglobulin domain-containing protein 10-like OS=Homo sapiens OX=9606 GN=VSIG10L PE=2 SV=2    | 7.78 | 91.6  |
| B7ZKJ8     | ITIH4 protein OS=Homo sapiens OX=9606 GN=ITIH4 PE=1 SV=1                                                   | 6.89 | 103.8 |
| F8VZX2     | Poly(rC)-binding protein 2 OS=Homo sapiens OX=9606 GN=PCBP2 PE=1 SV=1                                      | 8.24 | 33.8  |
| A0A087WWU8 | Tropomyosin alpha-3 chain OS=Homo sapiens OX=9606 GN=TPM3 PE=1 SV=1                                        | 4.78 | 26.4  |
| P22626     | Heterogeneous nuclear ribonucleoproteins A2/B1 OS=Homo sapiens OX=9606 GN=HNRNPA2B1 PE=1 SV=2              | 8.95 | 37.4  |
| G8JLG2     | Corneodesmosin OS=Homo sapiens OX=9606 GN=CDSN PE=1 SV=1                                                   | 8.44 | 51.6  |
| A0A2R8Y5V9 | Tropomyosin alpha-4 chain OS=Homo sapiens OX=9606 GN=TPM4 PE=1 SV=1                                        | 4.7  | 28.6  |
| H0YHX9     | Nascent polypeptide-associated complex subunit alpha OS=Homo sapiens OX=9606 GN=NACA PE=1 SV=2             | 4.55 | 25.3  |
| H0YJT9     | N-myc downstream-regulated gene 2 protein (Fragment) OS=Homo sapiens OX=9606 GN=NDRG2 PE=1 SV=1            | 7.08 | 31.3  |
| P61812     | Transforming growth factor beta-2 proprotein OS=Homo sapiens OX=9606 GN=TGFB2 PE=1 SV=1                    | 8.53 | 47.7  |
| Q13228     | Methanethiol oxidase OS=Homo sapiens OX=9606 GN=SELENBP1 PE=1 SV=2                                         | 6.37 | 52.4  |
| E7EQ64     | Trypsin-1 OS=Homo sapiens OX=9606 GN=PRSS1 PE=1 SV=1                                                       | 7.25 | 28.1  |
| P49720     | Proteasome subunit beta type-3 OS=Homo sapiens OX=9606 GN=PSMB3 PE=1 SV=2                                  | 6.55 | 22.9  |
| F8VR50     | Actin-related protein 2/3 complex subunit 3 (Fragment) OS=Homo sapiens OX=9606 GN=ARPC3 PE=1 SV=1          | 7.93 | 9.7   |
| P05120     | Plasminogen activator inhibitor 2 OS=Homo sapiens OX=9606 GN=SERPINB2 PE=1 SV=2                            | 5.63 | 46.6  |
| Q5VVC8     | 60S ribosomal protein L11 OS=Homo sapiens OX=9606 GN=RPL11 PE=1 SV=2                                       | 9.8  | 19    |
| Q14974     | Importin subunit beta-1 OS=Homo sapiens OX=9606 GN=KPNB1 PE=1 SV=2                                         | 4.78 | 97.1  |
| P32320     | Cytidine deaminase OS=Homo sapiens OX=9606 GN=CDA PE=1 SV=2                                                | 6.92 | 16.2  |
| P10586     | Receptor-type tyrosine-protein phosphatase F OS=Homo sapiens OX=9606 GN=PTPRF PE=1 SV=2                    | 6.3  | 212.7 |
| O75841     | Uroplakin-1b OS=Homo sapiens OX=9606 GN=UPK1B PE=1 SV=5                                                    | 5.35 | 29.6  |
| P61970     | Nuclear transport factor 2 OS=Homo sapiens OX=9606 GN=NUTF2 PE=1 SV=1                                      | 5.38 | 14.5  |
| D6RH31     | Nephronectin (Fragment) OS=Homo sapiens OX=9606 GN=NPNT PE=1 SV=1                                          | 8.4  | 66.9  |



|            |                                                                                                       |      |       |
|------------|-------------------------------------------------------------------------------------------------------|------|-------|
| P02751     | Fibronectin OS=Homo sapiens OX=9606 GN=FN1 PE=1 SV=5                                                  | 5.5  | 272.2 |
| E9PR14     | Serum amyloid A protein OS=Homo sapiens OX=9606 GN=SAA2 PE=3 SV=1                                     | 6.02 | 8.9   |
| P08493     | Matrix Gla protein OS=Homo sapiens OX=9606 GN=MGP PE=1 SV=2                                           | 9.67 | 12.3  |
| P26641     | Elongation factor 1-gamma OS=Homo sapiens OX=9606 GN=EEF1G PE=1 SV=3                                  | 6.67 | 50.1  |
| B4DPQ0     | Complement subcomponent C1r OS=Homo sapiens OX=9606 GN=C1R PE=1 SV=1                                  | 6.37 | 81.8  |
| Q5XXA6     | Anoctamin-1 OS=Homo sapiens OX=9606 GN=ANO1 PE=1 SV=1                                                 | 8.54 | 114   |
| P63241     | Eukaryotic translation initiation factor 5A-1 OS=Homo sapiens OX=9606 GN=EIF5A PE=1 SV=2              | 5.24 | 16.8  |
| Q9BS26     | Endoplasmic reticulum resident protein 44 OS=Homo sapiens OX=9606 GN=ERP44 PE=1 SV=1                  | 5.26 | 46.9  |
| Q9UBS4     | DnaJ homolog subfamily B member 11 OS=Homo sapiens OX=9606 GN=DNAJB11 PE=1 SV=1                       | 6.18 | 40.5  |
| P17858     | ATP-dependent 6-phosphofructokinase, liver type OS=Homo sapiens OX=9606 GN=PFKL PE=1 SV=6             | 7.5  | 85    |
| O75594     | Peptidoglycan recognition protein 1 OS=Homo sapiens OX=9606 GN=PGLYRP1 PE=1 SV=1                      | 8.59 | 21.7  |
| Q99536     | Synaptic vesicle membrane protein VAT-1 homolog OS=Homo sapiens OX=9606 GN=VAT1 PE=1 SV=2             | 6.29 | 41.9  |
| A0A2R8YDT1 | Glutamine synthetase OS=Homo sapiens OX=9606 GN=GLUL PE=1 SV=1                                        | 8.37 | 57.1  |
| E9PS12     | Alpha-crystallin B chain (Fragment) OS=Homo sapiens OX=9606 GN=CRYAB PE=1 SV=1                        | 6.95 | 9.2   |
| P09758     | Tumor-associated calcium signal transducer 2 OS=Homo sapiens OX=9606 GN=TACSTD2 PE=1 SV=3             | 8.87 | 35.7  |
| P01133     | Pro-epidermal growth factor OS=Homo sapiens OX=9606 GN=EGF PE=1 SV=2                                  | 5.85 | 133.9 |
| A0A075B6K6 | Immunoglobulin lambda variable 4-3 OS=Homo sapiens OX=9606 GN=IGLV4-3 PE=3 SV=1                       | 5.71 | 13.3  |
| P05387     | 60S acidic ribosomal protein P2 OS=Homo sapiens OX=9606 GN=RPLP2 PE=1 SV=1                            | 4.54 | 11.7  |
| P05386     | 60S acidic ribosomal protein P1 OS=Homo sapiens OX=9606 GN=RPLP1 PE=1 SV=1                            | 4.32 | 11.5  |
| Q15847     | Adipogenesis regulatory factor OS=Homo sapiens OX=9606 GN=ADIRF PE=1 SV=1                             | 5.31 | 7.9   |
| P62491     | Ras-related protein Rab-11A OS=Homo sapiens OX=9606 GN=RAB11A PE=1 SV=3                               | 6.57 | 24.4  |
| Q9P1F3     | Costars family protein ABRACL OS=Homo sapiens OX=9606 GN=ABRACL PE=1 SV=1                             | 6.29 | 9.1   |
| O43653     | Prostate stem cell antigen OS=Homo sapiens OX=9606 GN=PSCA PE=1 SV=2                                  | 4.94 | 12    |
| P40926     | Malate dehydrogenase, mitochondrial OS=Homo sapiens OX=9606 GN=MDH2 PE=1 SV=3                         | 8.68 | 35.5  |
| Q6P4A8     | Phospholipase B-like 1 OS=Homo sapiens OX=9606 GN=PLBD1 PE=1 SV=2                                     | 9.06 | 63.2  |
| P55259     | Pancreatic secretory granule membrane major glycoprotein GP2 OS=Homo sapiens OX=9606 GN=GP2 PE=1 SV=3 | 5.24 | 59.4  |
| Q9UM07     | Protein-arginine deiminase type-4 OS=Homo sapiens OX=9606 GN=PADI4 PE=1 SV=2                          | 6.58 | 74    |



|            |                                                                                                                           |       |       |
|------------|---------------------------------------------------------------------------------------------------------------------------|-------|-------|
| Q11206     | CMP-N-acetylneuraminate-beta-galactosamide-alpha-2,3-sialyltransferase 4 OS=Homo sapiens OX=9606 GN=ST3GAL4 PE=1 SV=1     | 9.41  | 38    |
| O00754     | Lysosomal alpha-mannosidase OS=Homo sapiens OX=9606 GN=MAN2B1 PE=1 SV=3                                                   | 7.28  | 113.7 |
| P15153     | Ras-related C3 botulinum toxin substrate 2 OS=Homo sapiens OX=9606 GN=RAC2 PE=1 SV=1                                      | 7.61  | 21.4  |
| P52565     | Rho GDP-dissociation inhibitor 1 OS=Homo sapiens OX=9606 GN=ARHGDI1 PE=1 SV=3                                             | 5.11  | 23.2  |
| P08133     | Annexin A6 OS=Homo sapiens OX=9606 GN=ANXA6 PE=1 SV=3                                                                     | 5.6   | 75.8  |
| V9GYS1     | Apolipoprotein A-II OS=Homo sapiens OX=9606 GN=APOA2 PE=1 SV=1                                                            | 5.01  | 9.2   |
| P11047     | Laminin subunit gamma-1 OS=Homo sapiens OX=9606 GN=LAMC1 PE=1 SV=3                                                        | 5.12  | 177.5 |
| Q16853     | Membrane primary amine oxidase OS=Homo sapiens OX=9606 GN=AOC3 PE=1 SV=3                                                  | 6.52  | 84.6  |
| H0Y586     | Proteasome subunit alpha type-7 (Fragment) OS=Homo sapiens OX=9606 GN=PSMA7 PE=1 SV=1                                     | 8.87  | 21.2  |
| P06727     | Apolipoprotein A-IV OS=Homo sapiens OX=9606 GN=APOA4 PE=1 SV=4                                                            | 5.38  | 45.3  |
| P26583     | High mobility group protein B2 OS=Homo sapiens OX=9606 GN=HMGB2 PE=1 SV=2                                                 | 7.81  | 24    |
| G3V3U4     | Proteasome subunit alpha type OS=Homo sapiens OX=9606 GN=PSMA6 PE=1 SV=1                                                  | 9.1   | 11.6  |
| Q687X5     | Metalloreductase STEAP4 OS=Homo sapiens OX=9606 GN=STEAP4 PE=1 SV=1                                                       | 9.29  | 51.9  |
| P04899     | Guanine nucleotide-binding protein G(i) subunit alpha-2 OS=Homo sapiens OX=9606 GN=GNAI2 PE=1 SV=3                        | 5.54  | 40.4  |
| P55957     | BH3-interacting domain death agonist OS=Homo sapiens OX=9606 GN=BID PE=1 SV=1                                             | 5.44  | 22    |
| P02760     | Protein AMBP OS=Homo sapiens OX=9606 GN=AMBP PE=1 SV=1                                                                    | 6.25  | 39    |
| Q9H4A4     | Aminopeptidase B OS=Homo sapiens OX=9606 GN=RNPEP PE=1 SV=2                                                               | 5.74  | 72.5  |
| Q13444     | Disintegrin and metalloproteinase domain-containing protein 15 OS=Homo sapiens OX=9606 GN=ADAM15 PE=1 SV=4                | 6.73  | 92.9  |
| P01880     | Immunoglobulin heavy constant delta OS=Homo sapiens OX=9606 GN=IGHD PE=1 SV=3                                             | 8.12  | 42.3  |
| Q5T123     | SH3 domain-binding glutamic acid-rich-like protein 3 OS=Homo sapiens OX=9606 GN=SH3BGL3 PE=1 SV=1                         | 9.36  | 9.4   |
| A0A590UJJ0 | Guanine nucleotide-binding protein G(s) subunit alpha isoforms short (Fragment) OS=Homo sapiens OX=9606 GN=GNAS PE=1 SV=1 | 4.94  | 23.9  |
| H0YF32     | 40S ribosomal protein S3 (Fragment) OS=Homo sapiens OX=9606 GN=RPS3 PE=1 SV=1                                             | 8     | 13.5  |
| P00918     | Carbonic anhydrase 2 OS=Homo sapiens OX=9606 GN=CA2 PE=1 SV=2                                                             | 7.4   | 29.2  |
| P62241     | 40S ribosomal protein S8 OS=Homo sapiens OX=9606 GN=RPS8 PE=1 SV=2                                                        | 10.32 | 24.2  |
| P28838     | Cytosol aminopeptidase OS=Homo sapiens OX=9606 GN=LAP3 PE=1 SV=3                                                          | 7.93  | 56.1  |
| P49327     | Fatty acid synthase OS=Homo sapiens OX=9606 GN=FASN PE=1 SV=3                                                             | 6.44  | 273.3 |
| B1AKG0     | Complement factor H-related protein 1 OS=Homo sapiens OX=9606 GN=CFHR1 PE=1 SV=1                                          | 7.81  | 30.8  |
| H0Y8G5     | Heterogeneous nuclear ribonucleoprotein D0 (Fragment) OS=Homo sapiens OX=9606 GN=HNRNPD PE=1 SV=8                         | 9.16  | 29.6  |

|            |                                                                                                                 |      |       |
|------------|-----------------------------------------------------------------------------------------------------------------|------|-------|
| P17213     | Bactericidal permeability-increasing protein OS=Homo sapiens OX=9606 GN=BPI PE=1 SV=4                           | 9.38 | 53.9  |
| E9PLK3     | Aminopeptidase OS=Homo sapiens OX=9606 GN=NPEPPS PE=1 SV=1                                                      | 5.6  | 102.9 |
| O15041     | Semaphorin-3E OS=Homo sapiens OX=9606 GN=SEMA3E PE=1 SV=1                                                       | 7.47 | 89.2  |
| Q86UX7     | Fermitin family homolog 3 OS=Homo sapiens OX=9606 GN=FERMT3 PE=1 SV=1                                           | 6.98 | 75.9  |
| P02778     | C-X-C motif chemokine 10 OS=Homo sapiens OX=9606 GN=CXCL10 PE=1 SV=2                                            | 9.86 | 10.9  |
| P18206     | Vinculin OS=Homo sapiens OX=9606 GN=VCL PE=1 SV=4                                                               | 5.66 | 123.7 |
| A0A0C4DH39 | Immunoglobulin heavy variable 1-58 OS=Homo sapiens OX=9606 GN=IGHV1-58 PE=3 SV=1                                | 9.25 | 13    |
| E7EMG9     | Lymphocyte-specific protein 1 (Fragment) OS=Homo sapiens OX=9606 GN=LSP1 PE=1 SV=1                              | 4.59 | 30.6  |
| P02656     | Apolipoprotein C-III OS=Homo sapiens OX=9606 GN=APOC3 PE=1 SV=1                                                 | 5.41 | 10.8  |
| Q86X91     | Inactive tyrosine-protein kinase 7 OS=Homo sapiens OX=9606 GN=PTK7 PE=1 SV=1                                    | 6.65 | 50.4  |
| F5H157     | Ras-related protein Rab-35 (Fragment) OS=Homo sapiens OX=9606 GN=RAB35 PE=1 SV=1                                | 8.31 | 21.2  |
| D6R9Z1     | Receptor of-activated protein C kinase 1 (Fragment) OS=Homo sapiens OX=9606 GN=RACK1 PE=1 SV=8                  | 8.84 | 26.3  |
| Q15828     | Cystatin-M OS=Homo sapiens OX=9606 GN=CST6 PE=1 SV=1                                                            | 8.09 | 16.5  |
| P14138     | Endothelin-3 OS=Homo sapiens OX=9606 GN=EDN3 PE=1 SV=1                                                          | 6.7  | 25.4  |
| A0A087WUC4 | Alcohol dehydrogenase 1C (Fragment) OS=Homo sapiens OX=9606 GN=ADH1C PE=1 SV=1                                  | 8.06 | 17.5  |
| A0A0J9YWB6 | RNA polymerase II subunit A C-terminal domain phosphatase (Fragment) OS=Homo sapiens OX=9606 GN=CTDP1 PE=1 SV=1 | 5.72 | 87.1  |
| P55795     | Heterogeneous nuclear ribonucleoprotein H2 OS=Homo sapiens OX=9606 GN=HNRNPH2 PE=1 SV=1                         | 6.3  | 49.2  |
| Q13296     | Mammaglobin-A OS=Homo sapiens OX=9606 GN=SCGB2A2 PE=1 SV=1                                                      | 4.3  | 10.5  |
| P17050     | Alpha-N-acetylgalactosaminidase OS=Homo sapiens OX=9606 GN=NAGA PE=1 SV=2                                       | 5.19 | 46.5  |
| P43026     | Growth/differentiation factor 5 OS=Homo sapiens OX=9606 GN=GDF5 PE=1 SV=3                                       | 9.79 | 55.4  |
| Q6UXB3     | Ly6/PLAUR domain-containing protein 2 OS=Homo sapiens OX=9606 GN=LYPD2 PE=1 SV=1                                | 5.96 | 13.1  |
| Q2I0M4     | Leucine-rich repeat-containing protein 26 OS=Homo sapiens OX=9606 GN=LRRC26 PE=1 SV=2                           | 9.17 | 34.8  |
| Q5T7C4     | High mobility group protein B1 OS=Homo sapiens OX=9606 GN=HMGB1 PE=1 SV=1                                       | 9.7  | 18.3  |
| Q5W0H4     | Translationally-controlled tumor protein OS=Homo sapiens OX=9606 GN=TPT1 PE=1 SV=1                              | 5.49 | 21.5  |
| Q9UBQ7     | Glyoxylate reductase/hydroxypyruvate reductase OS=Homo sapiens OX=9606 GN=GRHPR PE=1 SV=1                       | 7.39 | 35.6  |
| O76027     | Annexin A9 OS=Homo sapiens OX=9606 GN=ANXA9 PE=1 SV=3                                                           | 5.77 | 38.3  |
| P29692     | Elongation factor 1-delta OS=Homo sapiens OX=9606 GN=EEF1D PE=1 SV=5                                            | 5.01 | 31.1  |
| A0A3B3ITK7 | Phosphoglucosyltransferase-1 OS=Homo sapiens OX=9606 GN=PGM1 PE=1 SV=1                                          | 6.76 | 63.9  |

|            |                                                                                                             |       |       |
|------------|-------------------------------------------------------------------------------------------------------------|-------|-------|
| Q92882     | Osteoclast-stimulating factor 1 OS=Homo sapiens OX=9606 GN=OSTF1 PE=1 SV=2                                  | 5.68  | 23.8  |
| X6RFL8     | Ras-related protein Rab-14 (Fragment) OS=Homo sapiens OX=9606 GN=RAB14 PE=1 SV=1                            | 6.33  | 20.4  |
| Q9H444     | Charged multivesicular body protein 4b OS=Homo sapiens OX=9606 GN=CHMP4B PE=1 SV=1                          | 4.82  | 24.9  |
| P58546     | Myotrophin OS=Homo sapiens OX=9606 GN=MTPN PE=1 SV=2                                                        | 5.52  | 12.9  |
| P50995     | Annexin A11 OS=Homo sapiens OX=9606 GN=ANXA11 PE=1 SV=1                                                     | 7.65  | 54.4  |
| B4DUR8     | T-complex protein 1 subunit gamma OS=Homo sapiens OX=9606 GN=CCT3 PE=1 SV=1                                 | 5.64  | 55.6  |
| O95274     | Ly6/PLAUR domain-containing protein 3 OS=Homo sapiens OX=9606 GN=LYPD3 PE=1 SV=2                            | 7.75  | 35.9  |
| A0A1X7SBU6 | Adhesion G-protein-coupled receptor V1 (Fragment) OS=Homo sapiens OX=9606 GN=ADGRV1 PE=1 SV=1               | 4.78  | 288.2 |
| P43034     | Platelet-activating factor acetylhydrolase IB subunit beta OS=Homo sapiens OX=9606 GN=PAFAH1B1 PE=1 SV=2    | 7.37  | 46.6  |
| A0A0U1RQV5 | Uncharacterized protein (Fragment) OS=Homo sapiens OX=9606 PE=1 SV=1                                        | 4.88  | 11.8  |
| H7C125     | Ras-related protein Rab-2A (Fragment) OS=Homo sapiens OX=9606 GN=RAB2A PE=1 SV=1                            | 5.08  | 12.1  |
| P06576     | ATP synthase subunit beta, mitochondrial OS=Homo sapiens OX=9606 GN=ATP5F1B PE=1 SV=3                       | 5.4   | 56.5  |
| E9PCY7     | Heterogeneous nuclear ribonucleoprotein H OS=Homo sapiens OX=9606 GN=HNRNPH1 PE=1 SV=1                      | 6.34  | 47.1  |
| Q13630     | GDP-L-fucose synthase OS=Homo sapiens OX=9606 GN=GFUS PE=1 SV=1                                             | 6.6   | 35.9  |
| P08240     | Signal recognition particle receptor subunit alpha OS=Homo sapiens OX=9606 GN=SRPRA PE=1 SV=2               | 8.95  | 69.8  |
| E9PHK0     | Tetranectin OS=Homo sapiens OX=9606 GN=CLEC3B PE=1 SV=1                                                     | 5.05  | 17.8  |
| Q9NQ79     | Cartilage acidic protein 1 OS=Homo sapiens OX=9606 GN=CRTAC1 PE=1 SV=2                                      | 5.12  | 71.4  |
| P05156     | Complement factor I OS=Homo sapiens OX=9606 GN=CFI PE=1 SV=2                                                | 7.5   | 65.7  |
| P62701     | 40S ribosomal protein S4, X isoform OS=Homo sapiens OX=9606 GN=RPS4X PE=1 SV=2                              | 10.15 | 29.6  |
| Q9BYD5     | Cornifelin OS=Homo sapiens OX=9606 GN=CNFN PE=1 SV=2                                                        | 6.1   | 12.4  |
| P02747     | Complement C1q subcomponent subunit C OS=Homo sapiens OX=9606 GN=C1QC PE=1 SV=3                             | 8.41  | 25.8  |
| P49189     | 4-trimethylaminobutyraldehyde dehydrogenase OS=Homo sapiens OX=9606 GN=ALDH9A1 PE=1 SV=3                    | 5.87  | 53.8  |
| O95833     | Chloride intracellular channel protein 3 OS=Homo sapiens OX=9606 GN=CLIC3 PE=1 SV=2                         | 6.43  | 26.6  |
| P05546     | Heparin cofactor 2 OS=Homo sapiens OX=9606 GN=SERPIND1 PE=1 SV=3                                            | 6.9   | 57    |
| Q96QA5     | Gasdermin-A OS=Homo sapiens OX=9606 GN=GSDMA PE=1 SV=4                                                      | 5.29  | 49.3  |
| P08754     | Guanine nucleotide-binding protein G(i) subunit alpha OS=Homo sapiens OX=9606 GN=GNAI3 PE=1 SV=3            | 5.69  | 40.5  |
| F8W6H5     | Ectonucleotide pyrophosphatase/phosphodiesterase family member 3 OS=Homo sapiens OX=9606 GN=ENPP3 PE=1 SV=1 | 7.03  | 76    |
| P98095     | Fibulin-2 OS=Homo sapiens OX=9606 GN=FBLN2 PE=1 SV=2                                                        | 4.82  | 126.5 |

|            |                                                                                                        |      |       |
|------------|--------------------------------------------------------------------------------------------------------|------|-------|
| P52907     | F-actin-capping protein subunit alpha-1 OS=Homo sapiens OX=9606 GN=CAPZA1 PE=1 SV=3                    | 5.69 | 32.9  |
| P21333     | Filamin-A OS=Homo sapiens OX=9606 GN=FLNA PE=1 SV=4                                                    | 6.06 | 280.6 |
| A0A286YFM8 | D-3-phosphoglycerate dehydrogenase (Fragment) OS=Homo sapiens OX=9606 GN=PHGDH PE=1 SV=1               | 7.58 | 25.6  |
| P04114     | Apolipoprotein B-100 OS=Homo sapiens OX=9606 GN=APOB PE=1 SV=2                                         | 7.05 | 515.3 |
| Q9NUQ9     | CYFIP-related Rac1 interactor B OS=Homo sapiens OX=9606 GN=CYRIB PE=1 SV=1                             | 6.06 | 36.7  |
| P22894     | Neutrophil collagenase OS=Homo sapiens OX=9606 GN=MMP8 PE=1 SV=1                                       | 6.87 | 53.4  |
| P25705     | ATP synthase subunit alpha, mitochondrial OS=Homo sapiens OX=9606 GN=ATP5F1A PE=1 SV=1                 | 9.13 | 59.7  |
| P28676     | Grancalcin OS=Homo sapiens OX=9606 GN=GCA PE=1 SV=2                                                    | 5.21 | 24    |
| Q9Y2E5     | Epididymis-specific alpha-mannosidase OS=Homo sapiens OX=9606 GN=MAN2B2 PE=1 SV=4                      | 7.24 | 113.9 |
| P69905     | Hemoglobin subunit alpha OS=Homo sapiens OX=9606 GN=HBA1 PE=1 SV=2                                     | 8.68 | 15.2  |
| Q9HD89     | Resistin OS=Homo sapiens OX=9606 GN=RETN PE=1 SV=1                                                     | 6.86 | 11.4  |
| Q9UGL9     | Cysteine-rich C-terminal protein 1 OS=Homo sapiens OX=9606 GN=CRCT1 PE=1 SV=1                          | 8.66 | 9.7   |
| O00571     | ATP-dependent RNA helicase DDX3X OS=Homo sapiens OX=9606 GN=DDX3X PE=1 SV=3                            | 7.18 | 73.2  |
| B7Z8V9     | Cysteine-rich secretory protein LCCL domain-containing 1 OS=Homo sapiens OX=9606 GN=CRISPLD1 PE=1 SV=1 | 8.65 | 35    |
| A0A1X7SBS1 | Heterogeneous nuclear ribonucleoprotein U OS=Homo sapiens OX=9606 GN=HNRNPU PE=1 SV=1                  | 5.83 | 81.7  |
| O00151     | PDZ and LIM domain protein 1 OS=Homo sapiens OX=9606 GN=PDLIM1 PE=1 SV=4                               | 7.02 | 36    |
| P61978     | Heterogeneous nuclear ribonucleoprotein K OS=Homo sapiens OX=9606 GN=HNRNPK PE=1 SV=1                  | 5.54 | 50.9  |
| P04003     | C4b-binding protein alpha chain OS=Homo sapiens OX=9606 GN=C4BPA PE=1 SV=2                             | 7.3  | 67    |
| P07476     | Involucrin OS=Homo sapiens OX=9606 GN=IVL PE=1 SV=2                                                    | 4.61 | 68.4  |
| P80723     | Brain acid soluble protein 1 OS=Homo sapiens OX=9606 GN=BASP1 PE=1 SV=2                                | 4.63 | 22.7  |
| Q9Y624     | Junctional adhesion molecule A OS=Homo sapiens OX=9606 GN=F11R PE=1 SV=1                               | 7.9  | 32.6  |
| P25787     | Proteasome subunit alpha type-2 OS=Homo sapiens OX=9606 GN=PSMA2 PE=1 SV=2                             | 7.43 | 25.9  |
| P09525     | Annexin A4 OS=Homo sapiens OX=9606 GN=ANXA4 PE=1 SV=4                                                  | 6.13 | 35.9  |
| F6S2S5     | LIM and SH3 domain protein 1 OS=Homo sapiens OX=9606 GN=LASP1 PE=1 SV=1                                | 9.17 | 10.6  |
| Q07065     | Cytoskeleton-associated protein 4 OS=Homo sapiens OX=9606 GN=CKAP4 PE=1 SV=2                           | 5.92 | 66    |
| E9PBF6     | Lamin-B1 OS=Homo sapiens OX=9606 GN=LMNB1 PE=1 SV=1                                                    | 5.05 | 44.6  |
| H0YKU1     | Tropomodulin-3 (Fragment) OS=Homo sapiens OX=9606 GN=TMOD3 PE=1 SV=1                                   | 7.43 | 20.9  |
| P51991     | Heterogeneous nuclear ribonucleoprotein A3 OS=Homo sapiens OX=9606 GN=HNRNPA3 PE=1 SV=2                | 9.01 | 39.6  |

|            |                                                                                                                    |      |       |
|------------|--------------------------------------------------------------------------------------------------------------------|------|-------|
| Q6ZMJ4     | Interleukin-34 OS=Homo sapiens OX=9606 GN=IL34 PE=1 SV=1                                                           | 7.21 | 27.5  |
| A0A6Q8PGE6 | Ras-related protein Rab-7a OS=Homo sapiens OX=9606 GN=RAB7A PE=4 SV=1                                              | 5.15 | 21    |
| O43240     | Kallikrein-10 OS=Homo sapiens OX=9606 GN=KLK10 PE=1 SV=3                                                           | 8.59 | 30.2  |
| P55000     | Secreted Ly-6/uPAR-related protein 1 OS=Homo sapiens OX=9606 GN=SLURP1 PE=1 SV=2                                   | 5.33 | 11.2  |
| C9JDR0     | Sterol-4-alpha-carboxylate 3-dehydrogenase, decarboxylating (Fragment) OS=Homo sapiens OX=9606 GN=NSDHL PE=1 SV=1  | 6.54 | 28.1  |
| P30050     | 60S ribosomal protein L12 OS=Homo sapiens OX=9606 GN=RPL12 PE=1 SV=1                                               | 9.42 | 17.8  |
| Q9UJU6     | Drebrin-like protein OS=Homo sapiens OX=9606 GN=DBNL PE=1 SV=1                                                     | 5.05 | 48.2  |
| P19957     | Elafin OS=Homo sapiens OX=9606 GN=PI3 PE=1 SV=3                                                                    | 8.82 | 12.3  |
| P08185     | Corticosteroid-binding globulin OS=Homo sapiens OX=9606 GN=SERPINA6 PE=1 SV=1                                      | 6.04 | 45.1  |
| C9JPM3     | Disintegrin and metalloproteinase domain-containing protein 9 OS=Homo sapiens OX=9606 GN=ADAM9 PE=1 SV=1           | 8.95 | 16.8  |
| Q16610     | Extracellular matrix protein 1 OS=Homo sapiens OX=9606 GN=ECM1 PE=1 SV=2                                           | 6.71 | 60.6  |
| P43652     | Afamin OS=Homo sapiens OX=9606 GN=AFM PE=1 SV=1                                                                    | 5.9  | 69    |
| A0A0C4DH30 | Probable non-functional immunoglobulin heavy variable 3-16 OS=Homo sapiens OX=9606 GN=IGHV3-16 PE=1 SV=1           | 9.73 | 13.1  |
| P62857     | 40S ribosomal protein S28 OS=Homo sapiens OX=9606 GN=RPS28 PE=1 SV=1                                               | 10.7 | 7.8   |
| P30043     | Flavin reductase (NADPH) OS=Homo sapiens OX=9606 GN=BLVRB PE=1 SV=3                                                | 7.65 | 22.1  |
| E7EMS7     | Dermokine OS=Homo sapiens OX=9606 GN=DMKN PE=1 SV=1                                                                | 7.3  | 13.3  |
| P62714     | Serine/threonine-protein phosphatase 2A catalytic subunit beta isoform OS=Homo sapiens OX=9606 GN=PPP2CB PE=1 SV=1 | 5.43 | 35.6  |
| H3BT58     | Coactosin-like protein OS=Homo sapiens OX=9606 GN=COTL1 PE=1 SV=1                                                  | 8.41 | 8.2   |
| P04843     | Dolichyl-diphosphooligosaccharide--protein glycosyltransferase subunit 1 OS=Homo sapiens OX=9606 GN=RPN1 PE=1 SV=1 | 6.38 | 68.5  |
| P12532     | Creatine kinase U-type, mitochondrial OS=Homo sapiens OX=9606 GN=CKMT1A PE=1 SV=1                                  | 8.34 | 47    |
| A0A075B6I1 | Immunoglobulin lambda variable 4-60 OS=Homo sapiens OX=9606 GN=IGLV4-60 PE=3 SV=1                                  | 6.25 | 13    |
| P00966     | Argininosuccinate synthase OS=Homo sapiens OX=9606 GN=ASS1 PE=1 SV=2                                               | 8.02 | 46.5  |
| P35754     | Glutaredoxin-1 OS=Homo sapiens OX=9606 GN=GLRX PE=1 SV=2                                                           | 8.09 | 11.8  |
| P07741     | Adenine phosphoribosyltransferase OS=Homo sapiens OX=9606 GN=APRT PE=1 SV=2                                        | 6.02 | 19.6  |
| Q13315     | Serine-protein kinase ATM OS=Homo sapiens OX=9606 GN=ATM PE=1 SV=4                                                 | 6.81 | 350.5 |
| P28066     | Proteasome subunit alpha type-5 OS=Homo sapiens OX=9606 GN=PSMA5 PE=1 SV=3                                         | 4.79 | 26.4  |
| P20160     | Azurocidin OS=Homo sapiens OX=9606 GN=AZU1 PE=1 SV=3                                                               | 9.5  | 26.9  |
| P39687     | Acidic leucine-rich nuclear phosphoprotein 32 family member A OS=Homo sapiens OX=9606 GN=ANP32A PE=1 SV=1          | 4.09 | 28.6  |
| A0A2R8Y849 | 40S ribosomal protein S24 OS=Homo sapiens OX=9606 GN=RPS24 PE=1 SV=1                                               | 10.9 | 15.2  |



|            |                                                                                                              |           |           |
|------------|--------------------------------------------------------------------------------------------------------------|-----------|-----------|
| P84095     | Rho-related GTP-binding protein RhoG OS=Homo sapiens OX=9606 GN=RHOG PE=1 SV=1                               | 8.12      | 21.3      |
| G3V0G6     | Elastin OS=Homo sapiens OX=9606 GN=ELN PE=1 SV=1                                                             | 10.4<br>2 | 60.7      |
| Q9BQ50     | Three prime repair exonuclease 2 OS=Homo sapiens OX=9606 GN=TREX2 PE=1 SV=2                                  | 6.06      | 25.9      |
| Q00796     | Sorbitol dehydrogenase OS=Homo sapiens OX=9606 GN=SORD PE=1 SV=4                                             | 7.97      | 38.3      |
| Q6X4U4     | Sclerostin domain-containing protein 1 OS=Homo sapiens OX=9606 GN=SOSTDC1 PE=1 SV=2                          | 9.74      | 23.3      |
| P38606     | V-type proton ATPase catalytic subunit A OS=Homo sapiens OX=9606 GN=ATP6V1A PE=1 SV=2                        | 5.52      | 68.3      |
| P51688     | N-sulphoglucosamine sulphohydrolase OS=Homo sapiens OX=9606 GN=SGSH PE=1 SV=1                                | 6.95      | 56.7      |
| Q9NZV1     | Cysteine-rich motor neuron 1 protein OS=Homo sapiens OX=9606 GN=CRIM1 PE=1 SV=1                              | 5.21      | 113.<br>7 |
| P0DTE2     | Probable non-functional immunoglobulin heavy variable 8-51-1 OS=Homo sapiens OX=9606 GN=IGHV8-51-1 PE=1 SV=1 | 7.3       | 13.1      |
| P20618     | Proteasome subunit beta type-1 OS=Homo sapiens OX=9606 GN=PSMB1 PE=1 SV=2                                    | 8.13      | 26.5      |
| Q14134     | Tripartite motif-containing protein 29 OS=Homo sapiens OX=9606 GN=TRIM29 PE=1 SV=2                           | 7.15      | 65.8      |
| A0A024R571 | EH domain-containing protein 1 OS=Homo sapiens OX=9606 GN=EHD1 PE=1 SV=1                                     | 6.71      | 61.9      |
| C9JX20     | Krueppel-like factor 7 (Fragment) OS=Homo sapiens OX=9606 GN=KLF7 PE=1 SV=1                                  | 5.15      | 18.5      |
| C9JD84     | Latent-transforming growth factor beta-binding protein 1 OS=Homo sapiens OX=9606 GN=LTBP1 PE=1 SV=1          | 4.91      | 146.<br>9 |
| A0A0A0MSV6 | Complement C1q subcomponent subunit B (Fragment) OS=Homo sapiens OX=9606 GN=C1QB PE=1 SV=6                   | 9.16      | 24        |
| M0R261     | 6-phosphogluconolactonase (Fragment) OS=Homo sapiens OX=9606 GN=PGLS PE=1 SV=1                               | 5.86      | 23        |
| P12724     | Eosinophil cationic protein OS=Homo sapiens OX=9606 GN=RNASE3 PE=1 SV=2                                      | 10.0<br>2 | 18.4      |
| Q6ZN66     | Guanylate-binding protein 6 OS=Homo sapiens OX=9606 GN=GBP6 PE=2 SV=1                                        | 6.37      | 72.4      |
| Q96C19     | EF-hand domain-containing protein D2 OS=Homo sapiens OX=9606 GN=EFHD2 PE=1 SV=1                              | 5.2       | 26.7      |
| F8W156     | Coatomer subunit zeta OS=Homo sapiens OX=9606 GN=COPZ1 PE=1 SV=1                                             | 5.06      | 12        |
| Q99685     | Monoglyceride lipase OS=Homo sapiens OX=9606 GN=MGLL PE=1 SV=2                                               | 6.99      | 33.2      |
| Q15149     | Plectin OS=Homo sapiens OX=9606 GN=PLEC PE=1 SV=3                                                            | 5.96      | 531.<br>5 |
| P61009     | Signal peptidase complex subunit 3 OS=Homo sapiens OX=9606 GN=SPCS3 PE=1 SV=1                                | 8.62      | 20.3      |
| P50552     | Vasodilator-stimulated phosphoprotein OS=Homo sapiens OX=9606 GN=VASP PE=1 SV=3                              | 8.94      | 39.8      |
| P11215     | Integrin alpha-M OS=Homo sapiens OX=9606 GN=ITGAM PE=1 SV=2                                                  | 7.23      | 127.<br>1 |
| P23490     | Loricrin OS=Homo sapiens OX=9606 GN=LORICRIN PE=1 SV=2                                                       | 8.09      | 25.7      |
| Q13938     | Calcyphosin OS=Homo sapiens OX=9606 GN=CAPS PE=1 SV=2                                                        | 6.04      | 30.2      |



|            |                                                                                                             |           |           |
|------------|-------------------------------------------------------------------------------------------------------------|-----------|-----------|
| Q02878     | 60S ribosomal protein L6 OS=Homo sapiens OX=9606 GN=RPL6 PE=1 SV=3                                          | 10.5<br>8 | 32.7      |
| C9J155     | Neutrophil cytosol factor 1 (Fragment) OS=Homo sapiens OX=9606 GN=NCF1 PE=1 SV=2                            | 9.23      | 19.4      |
| P25786     | Proteasome subunit alpha type-1 OS=Homo sapiens OX=9606 GN=PSMA1 PE=1 SV=1                                  | 6.61      | 29.5      |
| Q9Y446     | Plakophilin-3 OS=Homo sapiens OX=9606 GN=PKP3 PE=1 SV=1                                                     | 9.32      | 87        |
| A2ABF4     | Valine--tRNA ligase (Fragment) OS=Homo sapiens OX=9606 GN=VAR51 PE=1 SV=1                                   | 6.77      | 18.1      |
| M0R0R2     | 40S ribosomal protein S5 OS=Homo sapiens OX=9606 GN=RPS5 PE=1 SV=1                                          | 9.76      | 25.3      |
| Q10471     | Poly peptide N-acetylgalactosaminyltransferase 2 OS=Homo sapiens OX=9606 GN=GALNT2 PE=1 SV=1                | 8.35      | 64.7      |
| A0A494C1U9 | Neurogenic locus notch homolog protein 2 OS=Homo sapiens OX=9606 GN=NOTCH2 PE=4 SV=1                        | 7.12      | 29.7      |
| A0A0B4J288 | Cadherin-16 OS=Homo sapiens OX=9606 GN=CDH16 PE=1 SV=1                                                      | 5.11      | 19.2      |
| Q92520     | Protein FAM3C OS=Homo sapiens OX=9606 GN=FAM3C PE=1 SV=1                                                    | 8.29      | 24.7      |
| F8WD41     | Serum paraoxonase/lactonase 3 OS=Homo sapiens OX=9606 GN=PON3 PE=1 SV=1                                     | 5.11      | 30.7      |
| E9PKZ0     | 60S ribosomal protein L8 (Fragment) OS=Homo sapiens OX=9606 GN=RPL8 PE=1 SV=1                               | 10.7<br>6 | 22.4      |
| A0A087WUZ2 | IgG Fc-binding protein OS=Homo sapiens OX=9606 GN=FCGBP PE=1 SV=1                                           | 5.12      | 174       |
| P53004     | Biliverdin reductase A OS=Homo sapiens OX=9606 GN=BLVRA PE=1 SV=2                                           | 6.44      | 33.4      |
| O00468     | Agrin OS=Homo sapiens OX=9606 GN=AGRN PE=1 SV=6                                                             | 6.39      | 217.<br>2 |
| P39060     | Collagen alpha-1(XVIII) chain OS=Homo sapiens OX=9606 GN=COL18A1 PE=1 SV=5                                  | 6.01      | 178.<br>1 |
| A0A087WZC4 | Protein-glutamine gamma-glutamyltransferase 5 OS=Homo sapiens OX=9606 GN=TGM5 PE=1 SV=1                     | 6.35      | 71.7      |
| P02748     | Complement component C9 OS=Homo sapiens OX=9606 GN=C9 PE=1 SV=2                                             | 5.59      | 63.1      |
| Q8WU39     | Marginal zone B- and B1-cell-specific protein OS=Homo sapiens OX=9606 GN=MZB1 PE=1 SV=1                     | 5.57      | 20.7      |
| A6NLN1     | Polypyrimidine tract-binding protein 1 OS=Homo sapiens OX=9606 GN=PTBP1 PE=1 SV=4                           | 9.38      | 56.5      |
| Q9BVC6     | Transmembrane protein 109 OS=Homo sapiens OX=9606 GN=TMEM109 PE=1 SV=1                                      | 10.4<br>8 | 26.2      |
| Q9BYE2     | Transmembrane protease serine 13 OS=Homo sapiens OX=9606 GN=TMPRSS13 PE=2 SV=5                              | 8.63      | 63.1      |
| F8WE71     | Serine/threonine-protein phosphatase PP1-beta catalytic subunit OS=Homo sapiens OX=9606 GN=PPP1CB PE=1 SV=1 | 5.25      | 6.9       |
| A0A0G2JMI3 | Immunoglobulin heavy variable 1-69-2 OS=Homo sapiens OX=9606 GN=IGHV1-69-2 PE=3 SV=2                        | 4.84      | 12.9      |
| Q9BR76     | Coronin-1B OS=Homo sapiens OX=9606 GN=CORO1B PE=1 SV=1                                                      | 5.88      | 54.2      |
| Q5VVQ6     | Ubiquitin thioesterase OTU1 OS=Homo sapiens OX=9606 GN=YOD1 PE=1 SV=1                                       | 6.11      | 38.3      |
| P25398     | 40S ribosomal protein S12 OS=Homo sapiens OX=9606 GN=RPS12 PE=1 SV=3                                        | 7.21      | 14.5      |

|            |                                                                                                                                   |           |           |
|------------|-----------------------------------------------------------------------------------------------------------------------------------|-----------|-----------|
| O95867     | Lymphocyte antigen 6 complex locus protein G6c OS=Homo sapiens<br>OX=9606 GN=LY6G6C PE=1 SV=1                                     | 8.15      | 13.8      |
| P16401     | Histone H1.5 OS=Homo sapiens OX=9606 GN=H1-5 PE=1 SV=3                                                                            | 10.9<br>2 | 22.6      |
| O60234     | Glia maturation factor gamma OS=Homo sapiens OX=9606 GN=GMFG<br>PE=1 SV=1                                                         | 5.26      | 16.8      |
| Q8IX05     | CD302 antigen OS=Homo sapiens OX=9606 GN=CD302 PE=1 SV=1                                                                          | 4.61      | 26.2      |
| P49908     | Selenoprotein P OS=Homo sapiens OX=9606 GN=SELENOP PE=1 SV=3                                                                      | 7.87      | 43.2      |
| P28070     | Proteasome subunit beta type-4 OS=Homo sapiens OX=9606<br>GN=PSMB4 PE=1 SV=4                                                      | 5.97      | 29.2      |
| G3V1M7     | Very long-chain-specific acyl-CoA dehydrogenase, mitochondrial<br>(Fragment) OS=Homo sapiens OX=9606 GN=ACADVL PE=1 SV=2          | 8.75      | 30.7      |
| P29350     | Tyrosine-protein phosphatase non-receptor type 6 OS=Homo sapiens<br>OX=9606 GN=PTPN6 PE=1 SV=1                                    | 7.78      | 67.5      |
| P08138     | Tumor necrosis factor receptor superfamily member 16 OS=Homo<br>sapiens OX=9606 GN=NGFR PE=1 SV=1                                 | 4.7       | 45.2      |
| K7ES69     | Calponin-2 OS=Homo sapiens OX=9606 GN=CNN2 PE=1 SV=1                                                                              | 9.04      | 16.5      |
| A0A075B6I4 | Immunoglobulin lambda variable 10-54 OS=Homo sapiens OX=9606<br>GN=IGLV10-54 PE=3 SV=1                                            | 8.03      | 12.4      |
| P47989     | Xanthine dehydrogenase/oxidase OS=Homo sapiens OX=9606 GN=XDH<br>PE=1 SV=4                                                        | 7.66      | 146.<br>3 |
| O75342     | Arachidonate 12-lipoxygenase, 12R-type OS=Homo sapiens OX=9606<br>GN=ALOX12B PE=1 SV=1                                            | 7.64      | 80.3      |
| E7ET17     | Peroxisomal multifunctional enzyme type 2 OS=Homo sapiens OX=9606<br>GN=HSD17B4 PE=1 SV=1                                         | 8.79      | 64.9      |
| Q96HC4     | PDZ and LIM domain protein 5 OS=Homo sapiens OX=9606 GN=PDLIM5<br>PE=1 SV=5                                                       | 8.21      | 63.9      |
| P13866     | Sodium/glucose cotransporter 1 OS=Homo sapiens OX=9606<br>GN=SLC5A1 PE=1 SV=1                                                     | 7.68      | 73.4      |
| P30153     | Serine/threonine-protein phosphatase 2A 65 kDa regulatory subunit A<br>alpha isoform OS=Homo sapiens OX=9606 GN=PPP2R1A PE=1 SV=4 | 5.11      | 65.3      |
| P17174     | Aspartate aminotransferase, cytoplasmic OS=Homo sapiens OX=9606<br>GN=GOT1 PE=1 SV=3                                              | 7.01      | 46.2      |
| Q7L5L3     | Lysophospholipase D GDPD3 OS=Homo sapiens OX=9606 GN=GDPD3<br>PE=1 SV=3                                                           | 7.97      | 36.6      |
| F8VVM2     | Phosphate carrier protein, mitochondrial OS=Homo sapiens OX=9606<br>GN=SLC25A3 PE=1 SV=1                                          | 9.26      | 36.1      |
| D6RD67     | Methylcrotonoyl-CoA carboxylase beta chain, mitochondrial (Fragment)<br>OS=Homo sapiens OX=9606 GN=MCCC2 PE=1 SV=2                | 8.29      | 31.6      |
| P48595     | Serpin B10 OS=Homo sapiens OX=9606 GN=SERPINB10 PE=1 SV=1                                                                         | 6.16      | 45.4      |

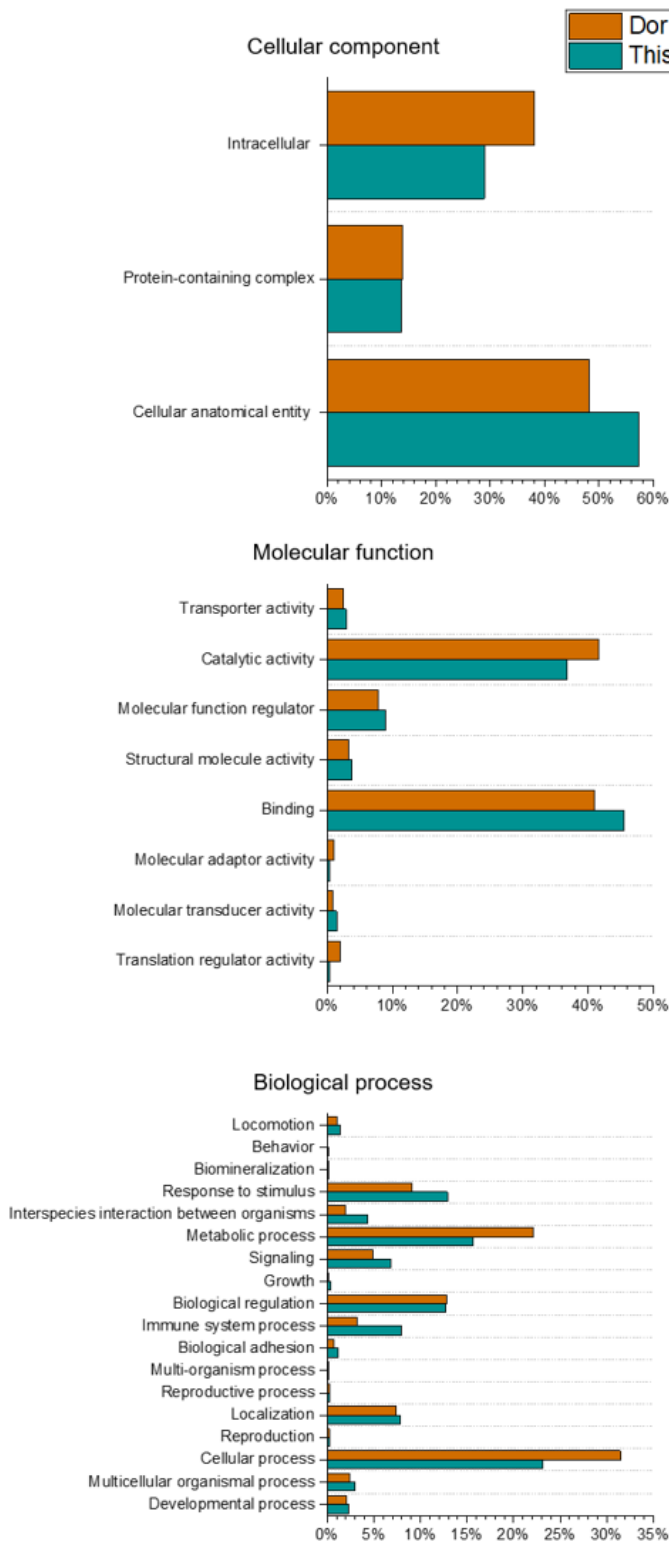

**Supporting information S4.** Bar charts of the molecular functions, cellular components, and biological processes obtained with the 890 proteins identified in this work, using the PANTHER program. The results are compared with the protein list published by Dor and coworkers.

**Supporting information S5:** Lysosome pathway. Pink boxes highlight the proteins identified in this work.

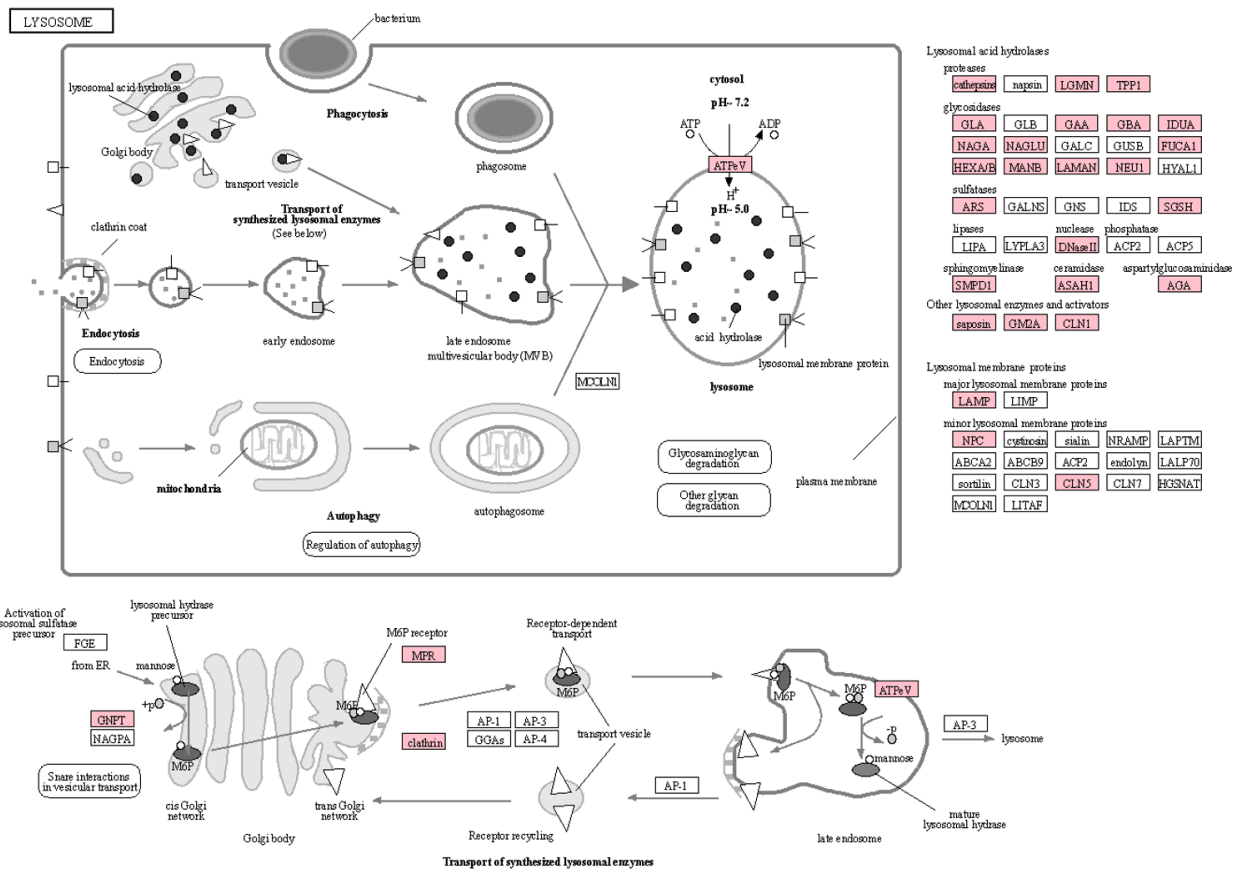

**Supporting information S6:** Complement and coagulation cascades pathway. Pink boxes highlight the proteins identified in this work.

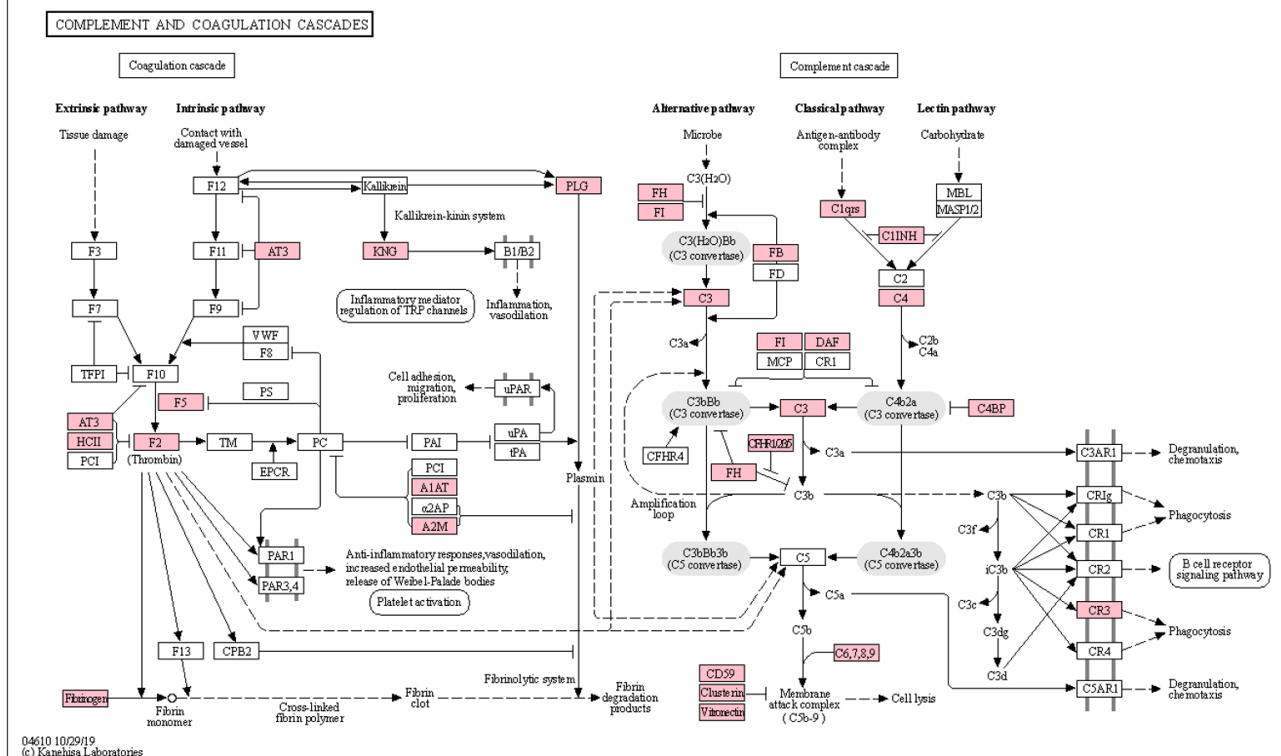

**Supporting information S8.** List of differentially expressed proteins in Male vs. Female subjects.

| Accession | Reference                           | F<br>Ratio | Prob<br>>F | Gene<br>Name | DAVE_MaleVsFe<br>male | DCI  |
|-----------|-------------------------------------|------------|------------|--------------|-----------------------|------|
| A0A075B6  |                                     |            | 4.98E      | IGLV4-       |                       | 8.E+ |
| H9        | Immunoglobulin lambda variable 4-69 | 4.33       | -02        | 69           | -1.11                 | 08   |
| A0A087X0  |                                     | 16.8       | 5.13E      |              |                       | 2.E+ |
| S5        | Collagen alpha-1(VI) chain          | 0          | -04        | COL6A1       | 1.26                  | 10   |
| A0A0J9YX  | Ras GTPase-activating-like protein  |            | 2.45E      |              |                       | 5.E+ |
| Z5        | IQGAP1                              | 5.88       | -02        | IQGAP1       | 0.72                  | 08   |
| A0A5F9UP  |                                     |            | 7.93E      |              |                       | 2.E+ |
| 49        | 45 kDa calcium-binding protein      | 8.61       | -03        | SDF4         | 0.32                  | 10   |
|           | Disintegrin and metalloproteinase   |            | 4.43E      |              |                       | 7.E+ |
| C9JPM3    | domain-containing protein 9         | 4.58       | -02        | ADAM9        | 0.40                  | 07   |
|           |                                     |            |            |              |                       | -    |
|           | Heat shock cognate 71 kDa protein   | 10.9       | 3.33E      |              |                       | 6.E+ |
| E9PK54    | (Fragment)                          | 5          | -03        | HSPA8        | -2.00                 | 08   |
|           |                                     |            |            |              |                       | -    |
|           | Acid sphingomyelinase-like          |            | 1.78E      | SMPDL        |                       | 9.E+ |
| F8VWW8    | phosphodiesterase 3b                | 6.61       | -02        | 3B           | -1.20                 | 08   |
|           |                                     |            | 3.63E      | HNRNP        |                       | 1.E+ |
| F8W6I7    | Helix-destabilizing protein         | 5.00       | -02        | A1           | 2.00                  | 09   |
|           | Extracellular glycoprotein lacritin | 10.3       | 4.09E      |              |                       | 3.E+ |
| HOYI00    | (Fragment)                          | 8          | -03        | LACRT        | 0.74                  | 12   |
|           | Na(+)/H(+) exchange regulatory      |            | 2.09E      | SLC9A3       |                       | 2.E+ |
| O14745    | cofactor NHE-RF1                    | 6.23       | -02        | R1           | 0.89                  | 09   |



|        |                                                  |      |          |          |       |        |
|--------|--------------------------------------------------|------|----------|----------|-------|--------|
| O43707 | Alpha-actinin-4                                  | 5.55 | 2.83E-02 | ACTN4    | 0.84  | 8.E+09 |
| O75083 | WD repeat-containing protein 1                   | 7.64 | 1.16E-02 | WDR1     | -1.10 | 1.E+10 |
| O75976 | Carboxypeptidase D                               | 4.71 | 4.17E-02 | CPD      | -0.43 | 4.E+08 |
| O95867 | Lymphocyte antigen 6 complex locus protein G6c   | 4.87 | 3.86E-02 | LY6G6C   | 2.00  | 5.E+08 |
| P00751 | Complement factor B                              | 4.35 | 4.94E-02 | CFB      | 0.44  | 2.E+09 |
| P01718 | Immunoglobulin lambda variable 3-27              | 4.73 | 4.11E-02 | IGLV3-27 | 0.95  | 2.E+10 |
| P01763 | Immunoglobulin heavy variable 3-48               | 5.08 | 3.51E-02 | IGHV3-48 | -1.54 | 8.E+09 |
| P01768 | Immunoglobulin heavy variable 3-30               | 6.16 | 2.16E-02 | IGHV3-30 | -2.00 | 9.E+09 |
| P03973 | Antileukoproteinase                              | 7.56 | 1.20E-02 | SLPI     | 0.60  | 6.E+12 |
| P05090 | Apolipoprotein D                                 | 7.89 | 1.05E-02 | APOD     | 0.63  | 1.E+11 |
| P07476 | Involucrin                                       | 6.21 | 2.11E-02 | IVL      | 1.23  | 2.E+08 |
| P21980 | Protein-glutamine gamma-glutamyltransferase 2    | 4.64 | 4.30E-02 | TGM2     | -2.00 | 2.E+09 |
| P22352 | Glutathione peroxidase 3                         | 10.3 | 4.19E-03 | GPX3     | 0.33  | 6.E+10 |
| P25311 | Zinc-alpha-2-glycoprotein                        | 10.4 | 3.97E-03 | AZGP1    | 0.49  | 1.E+15 |
| P29350 | Tyrosine-protein phosphatase non-receptor type 6 | 13.9 | 1.24E-03 | PTPN6    | 2.00  | 6.E+08 |
| P31025 | Lipocalin-1                                      | 8.79 | 7.39E-03 | LCN1     | -0.29 | 6.E+17 |
| P55064 | Aquaporin-5                                      | 6.19 | 2.13E-02 | AQP5     | 1.07  | 2.E+10 |
| P68104 | Elongation factor 1-alpha 1                      | 7.45 | 1.26E-02 | EEF1A1   | 1.08  | 1.E+11 |
| P81605 | Dermcidin                                        | 4.40 | 4.82E-02 | DCD      | 0.79  | 7.E+11 |
| Q3ZCM7 | Tubulin beta-8 chain                             | 8.34 | 8.81E-03 | TUBB8    | -0.45 | 1.E+09 |
| Q6UXB2 | C-X-C motif chemokine 17                         | 7.34 | 1.31E-02 | CXCL17   | -0.40 | 4.E+10 |
| Q86UD1 | Out at first protein homolog                     | 8.03 | 9.96E-03 | OAF      | -0.41 | 9.E+09 |

|        |                                                                               |      |          |         |       |        |
|--------|-------------------------------------------------------------------------------|------|----------|---------|-------|--------|
| Q8NBJ4 | Golgi membrane protein 1                                                      | 8.31 | 8.91E-03 | GOLM1   | 0.48  | 8.E+10 |
| Q8NBJ7 | Inactive C-alpha-formylglycine-generating enzyme 2                            | 7.26 | 1.36E-02 | SUMF2   | 0.47  | 3.E+09 |
| Q8NES3 | Beta-1,3-N-acetylglucosaminyltransferase lunatic fringe                       | 5.38 | 3.06E-02 | LFNG    | 0.29  | 2.E+09 |
| Q8NI22 | Multiple coagulation factor deficiency protein 2                              | 8.90 | 7.09E-03 | MCFD2   | 1.57  | 4.E+09 |
| Q96S96 | Phosphatidylethanolamine-binding protein 4                                    | 5.00 | 3.64E-02 | PEBP4   | 0.46  | 1.E+11 |
| Q9P1F3 | Costars family protein ABRACL                                                 | 5.22 | 3.28E-02 | ABRACL  | 0.45  | 2.E+09 |
| Q9UBR2 | Cathepsin Z                                                                   | 5.18 | 3.34E-02 | CTSZ    | -0.57 | -      |
| Q9UN76 | Sodium- and chloride-dependent neutral and basic amino acid transporter B(0+) | 5.41 | 3.02E-02 | SLC6A14 | 0.44  | 4.E+09 |
|        |                                                                               |      |          |         |       | 3.E+08 |

**Supporting information S8.** List of differentially expressed proteins in Morning vs. Afternoon samples, collected from Subject 09 and 13.

| Accession                | F<br>Ratio | Prob>F   | Reference                                                                                                     | Gene name  | Morning vs.<br>Afternoon |          | Morning vs.<br>Afternoon<br>(Subj. 13) |          | Morning vs. Afternoon (Subj.<br>09) |           |
|--------------------------|------------|----------|---------------------------------------------------------------------------------------------------------------|------------|--------------------------|----------|----------------------------------------|----------|-------------------------------------|-----------|
|                          |            |          |                                                                                                               |            | DAVE                     | DCI      | DAVE                                   | DCI      | DAVE                                | DCI       |
| <u><b>A0A075B6I9</b></u> | 4.97       | 3.64E-02 | Immunoglobulin lambda variable 7-46 OS=Homo sapiens OX=9606<br>GN=IGLV7-46 PE=3 SV=4                          | IGLV7-46   | 0.45                     | 6.97E+12 | 0.20                                   | 2.21E+12 | 0.68                                | 1.59E+13  |
| <u><b>A0A075B6R9</b></u> | 4.36       | 4.85E-02 | Probable non-functional immunoglobulin kappa variable 2D-24 OS=Homo sapiens OX=9606<br>GN=IGKV2D-24 PE=1 SV=1 | IGKV2D-24  | 0.42                     | 6.04E+11 | 0.71                                   | 2.74E+10 | -1.46                               | -2.15E+11 |
| <u><b>A0A075B6S5</b></u> | 9.36       | 5.75E-03 | Immunoglobulin kappa variable 1-27 OS=Homo sapiens OX=9606<br>GN=IGKV1-27 PE=3 SV=1                           | IGKV1-27   | 0.49                     | 5.66E+11 | 0.55                                   | 5.55E+11 | 0.51                                | 6.18E+11  |
| <u><b>A0A087WW49</b></u> | 5.72       | 2.57E-02 | Ig-like domain-containing protein (Fragment)<br>OS=Homo sapiens OX=9606 PE=4 SV=1                             | A0A087WW49 | 0.41                     | 1.30E+12 | 0.43                                   | 8.97E+11 | 0.94                                | 7.76E+12  |
| <u><b>A0A0B4J1V2</b></u> | 4.70       | 4.12E-02 | Immunoglobulin heavy variable 2-26 OS=Homo sapiens OX=9606<br>GN=IGHV2-26 PE=3 SV=1                           | IGHV2-26   | 1.10                     | 8.02E+10 | 0.71                                   | 8.15E+10 | 0.00                                | 0.00E+00  |
| <u><b>A0A0C4DH38</b></u> | 9.35       | 5.76E-03 | Immunoglobulin heavy variable 5-51 OS=Homo sapiens OX=9606<br>GN=IGHV5-51 PE=3 SV=1                           | IGHV5-51   | 0.66                     | 3.19E+11 | 0.44                                   | 2.02E+11 | 0.71                                | 3.52E+11  |

|                   |      |          |                                                                                             |            |      |          |      |          |  |       |           |
|-------------------|------|----------|---------------------------------------------------------------------------------------------|------------|------|----------|------|----------|--|-------|-----------|
|                   |      |          | sapiens OX=9606<br>GN=IGHV5-51 PE=3 SV=1<br>Ig-like domain-containing<br>protein (Fragment) |            |      |          |      |          |  |       |           |
| <u>A0A0J9YY99</u> | 7.02 | 1.47E-02 | OS=Homo sapiens<br>OX=9606 PE=1 SV=1                                                        | A0A0J9YY99 | 0.53 | 1.55E+13 | 0.30 | 7.19E+12 |  | 0.81  | 2.64E+13  |
| <u>A0A3B3IRN5</u> | 4.92 | 3.72E-02 | Fibromodulin OS=Homo sapiens OX=9606<br>GN=FMOD PE=1 SV=1                                   | FMOD       | 0.85 | 6.64E+09 | 1.49 | 2.18E+10 |  | -1.14 | -1.54E+09 |
| <u>A0A3B3IRX2</u> | 6.07 | 2.20E-02 | Phospholipase A2<br>OS=Homo sapiens<br>OX=9606 GN=PLA2G2A<br>PE=1 SV=1                      | PLA2G2A    | 0.31 | 5.92E+14 | 0.51 | 1.35E+15 |  | 0.31  | 5.06E+14  |
| <u>A0A5H1ZRS9</u> | 4.55 | 4.42E-02 | Immunoglobulin kappa<br>variable 2D-29 OS=Homo sapiens OX=9606<br>GN=IGKV2D-29 PE=1 SV=1    | IGKV2D-29  | 0.17 | 3.01E+12 | 0.21 | 3.23E+12 |  | 0.87  | 4.80E+13  |
| <u>P01599</u>     | 4.63 | 4.26E-02 | Immunoglobulin kappa<br>variable 1-17 OS=Homo sapiens OX=9606<br>GN=IGKV1-17 PE=1 SV=2      | IGKV1-17   | 0.40 | 4.63E+10 | 0.39 | 2.45E+10 |  | 0.36  | 5.17E+10  |
| <u>P01619</u>     | 7.03 | 1.46E-02 | Immunoglobulin kappa<br>variable 3-20 OS=Homo sapiens OX=9606<br>GN=IGKV3-20 PE=1 SV=2      | IGKV3-20   | 0.49 | 3.85E+13 | 0.30 | 1.92E+13 |  | 0.87  | 1.15E+14  |
| <u>P01834</u>     | 4.51 | 4.51E-02 | Immunoglobulin kappa<br>constant OS=Homo sapiens OX=9606<br>GN=IGKC PE=1 SV=2               | IGKC       | 0.41 | 5.97E+15 | 0.27 | 3.62E+15 |  | 0.74  | 1.70E+16  |
| <u>P04430</u>     | 4.93 | 3.69E-02 | Immunoglobulin kappa<br>variable 1-16 OS=Homo                                               | IGKV1-16   | 0.59 | 9.14E+10 | 0.32 | 4.13E+10 |  | 0.72  | 1.17E+11  |

|                      |       |          |                                                                                                                                |           |      |          |       |          |      |          |
|----------------------|-------|----------|--------------------------------------------------------------------------------------------------------------------------------|-----------|------|----------|-------|----------|------|----------|
|                      |       |          | sapiens OX=9606<br>GN=IGKV1-16 PE=1 SV=2<br>Immunoglobulin kappa<br>variable 1D-39 OS=Homo                                     |           |      |          |       |          |      |          |
| <b><u>P04432</u></b> | 5.38  | 3.00E-02 | sapiens OX=9606<br>GN=IGKV1D-39 PE=3 SV=2<br>Immunoglobulin kappa<br>variable 4-1 OS=Homo                                      | IGKV1D-39 | 0.53 | 3.43E+12 | 0.44  | 2.34E+12 | 0.68 | 5.96E+12 |
| <b><u>P06312</u></b> | 5.46  | 2.90E-02 | sapiens OX=9606<br>GN=IGKV4-1 PE=1 SV=1<br>Monocyte differentiation<br>antigen CD14 OS=Homo                                    | IGKV4-1   | 0.20 | 5.95E+11 | 0.21  | 4.45E+11 | 0.95 | 8.69E+12 |
| <b><u>P08571</u></b> | 10.11 | 4.34E-03 | sapiens OX=9606<br>GN=CD14 PE=1 SV=2<br>Pleiotrophin OS=Homo                                                                   | CD14      | 0.46 | 4.11E+10 | 0.45  | 4.21E+10 | 0.44 | 3.87E+10 |
| P21246               | 6.01  | 2.27E-02 | sapiens OX=9606 GN=PTN<br>PE=1 SV=1<br>Peptidyl-prolyl cis-trans<br>isomerase C OS=Homo                                        | PTN       | 1.28 | 2.48E+09 | 0.85  | 2.54E+09 | 2.00 | 4.78E+08 |
| <b><u>P45877</u></b> | 7.28  | 1.32E-02 | sapiens OX=9606 GN=PPIC<br>PE=1 SV=1<br>Neutrophil gelatinase-<br>associated lipocalin<br>OS=Homo sapiens                      | PPIC      | 0.31 | 6.05E+09 | 0.07  | 1.04E+09 | 0.76 | 2.30E+10 |
| <b><u>P80188</u></b> | 4.95  | 3.67E-02 | OX=9606 GN=LCN2 PE=1<br>SV=2<br>Basement membrane-<br>specific heparan sulfate<br>proteoglycan core protein<br>OS=Homo sapiens | LCN2      | 0.32 | 2.57E+12 | 0.29  | 1.87E+12 | 0.55 | 7.91E+12 |
| <b><u>P98160</u></b> | 4.88  | 3.79E-02 | OX=9606 GN=HSPG2 PE=1<br>SV=4                                                                                                  | HSPG2     | 0.26 | 1.09E+14 | -0.07 | 2.70E+13 | 0.43 | 1.80E+14 |



|               |      |          |                                                                                             |          |       |          |       |          |       |           |
|---------------|------|----------|---------------------------------------------------------------------------------------------|----------|-------|----------|-------|----------|-------|-----------|
|               |      |          | CMP-N-acetylneuraminate-beta-galactosamide-alpha-2,3-sialyltransferase 1<br>OS=Homo sapiens |          |       |          |       |          |       |           |
| Q11201        | 5.11 | 3.40E-02 | OX=9606 GN=ST3GAL1<br>PE=2 SV=1                                                             | ST3GAL1  | -2.00 | 1.28E+08 | 0.00  | 0.00E+00 | -2.00 | -1.36E+09 |
|               |      |          | Chitinase-3-like protein 2<br>OS=Homo sapiens                                               |          |       |          |       |          |       |           |
| <u>Q15782</u> | 4.49 | 4.57E-02 | OX=9606 GN=CHI3L2 PE=1<br>SV=1                                                              | CHI3L2   | 0.47  | 1.95E+11 | 0.38  | 2.50E+11 | 1.82  | 1.80E+11  |
|               |      |          | Neuroserpin<br>OS=Homo sapiens OX=9606                                                      |          |       |          |       |          |       |           |
| <u>Q99574</u> | 5.32 | 3.08E-02 | GN=SERPINI1 PE=1 SV=1                                                                       | SERPINI1 | 0.28  | 4.51E+10 | 0.38  | 7.18E+10 | 0.24  | 4.21E+10  |
|               |      |          | Extracellular glycoprotein<br>lacritin OS=Homo sapiens                                      |          |       |          |       |          |       |           |
| <u>Q9GZZ8</u> | 5.59 | 2.73E-02 | OX=9606 GN=LACRT PE=1<br>SV=1                                                               | LACRT    | -0.89 | 7.31E+17 | -0.19 | 2.51E+16 | -0.94 | -2.42E+18 |
|               |      |          | Endoplasmic reticulum<br>aminopeptidase 1<br>OS=Homo sapiens                                |          |       |          |       |          |       |           |
| <u>Q9NZ08</u> | 5.37 | 3.02E-02 | OX=9606 GN=ERAP1 PE=1<br>SV=3                                                               | ERAP1    | 0.37  | 4.84E+09 | 0.60  | 1.49E+10 | 0.59  | 2.61E+09  |
|               |      |          | Dickkopf-related protein 4<br>OS=Homo sapiens                                               |          |       |          |       |          |       |           |
| <u>Q9UBT3</u> | 4.41 | 4.74E-02 | OX=9606 GN=DKK4 PE=1<br>SV=1                                                                | DKK4     | -0.36 | 8.52E+09 | -0.98 | 7.76E+10 | -0.59 | -2.72E+09 |
